# Supplementary material for: Nailfold Videocapillaroscopic Features and Other Clinical Risk Factors for Digital Ulcers in Systemic Sclerosis: A Multicenter, Prospective Cohort Study
Source: PubMed Central journal article supplement — Arthritis Rheumatol. 2016 Sep 28;68(10):2527–39. doi: 10.1002/art.39718 (PMC5129545; doi:10.1002/art.39718), 2016-09-28
Supplement: ART-68-2527-s001.pdf [file ART-68-2527-s001.pdf]

SUPPLEMENTARY FILE

Nailfold Videocapillaroscopic and Other Clinical Risk Factors for Digital Ulcers in Systemic Sclerosis: A Multicenter, Prospective Cohort Study

---

Maurizio Cutolo MD, Ariane L. Herrick MD, Oliver Distler MD, Mike Becker MD, Emma Beltran PhD, Patrick Carpentier MD, Clodoveo Ferri MD, Murat Inanç MD, Panayiotis Vlachoyiannopoulos MD, Harbajan Chadha-Boreham PhD, Emmanuelle Cottreel MSc, Thomas Pfister PhD, Daniel Rosenberg PhD, Juan V. Torres MSc, Vanessa Smith MD PhD, on behalf of the videoCAPillaroscopy (CAP) study investigators.

## Contents

|                                                                                                                                        |    |
|----------------------------------------------------------------------------------------------------------------------------------------|----|
| 1. CAP study Steering Committee members                                                                                                | 4  |
| 2. CAP study Principal Investigators                                                                                                   | 4  |
| 3. Selection of covariables potentially associated with future development of new digital ulcers through ULR to MLR                    | 7  |
| <i>Supplementary Table S1. Bundle 1: Demographics</i> .....                                                                            | 7  |
| <i>Supplementary Table S2. Bundle 2: Systemic sclerosis clinical characteristics</i> .....                                             | 10 |
| <i>Supplementary Table S3. Bundle 3: Digital ulcer characteristics</i> .....                                                           | 15 |
| <i>Supplementary Table S4. Bundle 4: Other clinical characteristics</i> .....                                                          | 20 |
| <i>Supplementary Table S5. Bundle 5: Nailfold videocapillaroscopic characteristics: quantitative assessment (6 sub-bundles)</i> .....  | 23 |
| <i>Supplementary Table S6. Nailfold videocapillaroscopic characteristics: qualitative assessment (1 covariable)</i> .....              | 36 |
| 4. Definitions of DUs, critical digital ischemia, and other digital lesions                                                            | 37 |
| <i>Supplementary Table S7. Definitions of digital ulcer (DU), critical digital ischemia, and other (than DU) digital lesions</i> ..... | 37 |
| 5. Chart for DU location                                                                                                               | 38 |
| <i>Supplementary Figure S1. Coding of the location of digital ulcers</i> .....                                                         | 38 |
| 6. Investigator booklet                                                                                                                | 39 |
| 7. Interactions – bundle 6                                                                                                             | 40 |
| <i>Supplementary Table S8. Interactions investigated and grouped into a separate bundle on Steering Committee advice</i> .....         | 40 |
| 8. Excluded variables                                                                                                                  | 41 |
| <i>Supplementary Table S9. Overview of variables excluded because they consisted of fewer than 20 patients</i> .....                   | 41 |
| <i>Supplementary Table S10. Overview of variables excluded on clinical advice from the Steering Committee</i> .....                    | 42 |
| 9. New digital ulcer occurrence by Center                                                                                              | 43 |
| <i>Figure S2. Frequency of Patients, Cases, and Non-Cases per Center</i> .....                                                         | 43 |

|                                                                                                                                                           |    |
|-----------------------------------------------------------------------------------------------------------------------------------------------------------|----|
| 10. Within-bundle MLR models                                                                                                                              | 44 |
| <i>Table S11. Bundle 1: Demographics within-bundle MLR model</i> .....                                                                                    | 44 |
| <i>Table S12. Bundle 2: Systemic sclerosis clinical characteristics within-bundle MLR model</i> .....                                                     | 45 |
| <i>Table S13. Bundle 3: Digital ulcer characteristics within-bundle MLR model</i> .....                                                                   | 46 |
| <i>Table S14. Bundle 4: Other clinical characteristics within-bundle MLR model</i> .....                                                                  | 47 |
| <i>Table S15. Bundle 5: Quantitative NVC characteristics within-bundle MLR model</i> .....                                                                | 48 |
| <i>Table S16. Comparison of the within-bundle MLR models of NVC sub-bundles</i> .....                                                                     | 49 |
| 11. NVC characteristics carried forward during multivariable analyses                                                                                     | 50 |
| <i>Supplementary Table S17. Complete list of NVC variables carried forward from MLR within-</i><br><i>bundle to MLR across-bundles analysis.</i> .....    | 50 |
| 12. Operating characteristics of the final MLR model                                                                                                      | 51 |
| <i>Supplementary Figure S3. Receiver operating characteristic curve (A) and sensitivity/specificity</i><br><i>curves (B) of the final MLR model</i> ..... | 51 |
| 13. CAP study Statisticians                                                                                                                               | 52 |

The images on pages 1, 4–7, and 9–13 of Supplementary section 6 are from Drs. R. De Angelis, P. Del Medico, V. Riccieri, and A. Sulli and are reproduced with permission of the publisher, from M. Cutolo, editor. Atlas of Capillaroscopy in Rheumatic Diseases. Milan: Elsevier; 2010. p. 44, 47, 57, 63–64, 66–68, 72, 79–80, 86.

## **1. CAP study Steering Committee members**

**Maurizio Cutolo**, *Research Laboratory and Academic Division of Clinical Rheumatology, University of Genova, IRCCS AOU S. Martino, Genova, Italy*; **Ariane L. Herrick**, *Centre for Musculoskeletal Research, The University of Manchester, Salford Royal NHS Foundation Trust, Manchester Academic Health Science Centre, Manchester and NIHR Manchester Musculoskeletal Biomedical Research Unit, Central Manchester NHS Foundation Trust, Manchester Academic Health Science Centre, Manchester, UK*; **Oliver Distler**, *Rheumatology, University Hospital, Zürich, Switzerland*; **Mike Becker**, *Rheumatology, University Hospital, Zürich, Switzerland, Rheumatology and Clinical Immunology, Charité University Hospital, Berlin, Germany*; **Emma Beltran**, *Hospital Universitario y Politécnico La Fe, Valencia, Spain*; **Patrick Carpentier**, *Vascular Medicine, La Tronche Hospital, Grenoble, France*; **Clodoveo Ferri**, *Chair & Rheumatology Unit, University of Modena & Reggio Emilia, Modena, Italy*; **Murat Inanç**, *Division of Rheumatology, Department of Internal Medicine, Istanbul Medical Faculty, Istanbul University, Istanbul, Turkey*; **Panayiotis Vlachoyiannopoulos**, *Department of Pathophysiology, Medical School, National and Kapodistrian University of Athens, Athens, Greece*; **Vanessa Smith**, *Department of Rheumatology, Ghent University Hospital; Ghent University, Ghent, Belgium*.

## **2. CAP study Principal Investigators**

The CAP study Investigators are as follows:

**Austria** – *Sozialmedizinisches Zentrum Süd-Kaiser-Franz-Josef-Spital, Vienna*: **L Erlacher**;

*Hanusch Krankenhaus der Gebietskrankenkasse, Vienna*: **M Hirschl**; *Medizinische Universität Wien,*

*Vienna*: **HP Kiener**; *Medizinische Universität Graz, Graz*: **E Pilger**.

**Belgium** – *Universitair Ziekenhuis Gent, Ghent*: **V Smith**; *Universitair Ziekenhuis Gasthuisberg,*

*Leuven*: **D Blockmans**; *Université Libre de Bruxelles Hôpital Erasme, Brussels*: **J-C Wautrecht**.

**Czech Republic** – *Revmatologický ústav, Prague*: **R Běcvar**.

**France** – *Centre Hospitalier Universitaire de Grenoble, La Tronche: P Carpentier; Hôpital Tenon, Paris: C Frances; Centre Hospitalier Universitaire Amiens, Amiens: C Lok; CHU Dupuytren, Limoges: A Sparsa; CHRU de Lille, Hôpital Claude Huriez, Lille: E Hachulla; CHU de Montpellier, Montpellier: I Quere; Groupe Hospitalier Cochin Saint Vincent de Paul, Paris: Y Allanore; Centre Hospitalier Universitaire de Nantes, Nantes: C Agard.*

**Germany** – *Charité Universitätsmedizin Berlin, Berlin: G Riemekasten; Universitätsklinik Köln, Cologne: N Hunzelmann; Sankt Josef-Hospital, Klinikum der Ruhr-Universität Bochum, Bochum-Gerthe: M Stücker; Asklepios Klinik Altona, Hamburg: K Ahmadi-Simab; Universitätsklinikum Münster, Münster: C Sunderkötter; Universitätsklinikum Halle (Saale), Halle: J Wohlrab; Kerckhoff-Klinik GmbH, Bad Nauheim: U Müller-Ladner; Universitätsklinikum Düsseldorf, Düsseldorf: M Schneider.*

**Greece** – *Laiko General Hospital, Athens: P Vlachoyianopoulos; General Hospital of Athens, Hippokration, Athens: D Vassilopoulos; University General Hospital of Ioannina, Ioannina: A Drosos; Hospital Board of General University Hospital of Patras, Patra: A Antonopoulos.*

**Israel** – *Rambam Medical Center, Haifa: A Balbir-Gurman; Sheba Medical Center, Tel-Hashomer: P Langevitz; Bnai Zion Medical Center, Haifa: I Rosner; Meir Medical Center, Kfar Saba: Y Levy.*

**Italy** – *Azienda Ospedale San Martino, Genova: M Cutolo; Azienda Ospedaliera Pisana Ospedale Santa Chiara, Pisa: S Bombardieri; Università Cattolica Sacro Curoe, Complesso Integrato Columbus, Rome: G Ferraccioli; Azienda Ospedaliera ‘Pugliese Ciaccio’ di Catanzaro, Catanzaro: S Mazzuca; Ospedale Murri-Università Politecnica delle Marche, Jesi: W Grassi; Azienda Ospedaliera Universitaria Integrata di Verona, Verona: C Lunardi; Azienda Ospedaliera Spedali Civili di Brescia, Brescia: P Airó; Policlinico Umberto I, Rome: V Ricciari.*

**The Netherlands** – *Vrije Universiteit Medisch Centrum, Amsterdam: AE Voskuyl; Leiden University Medical Center, Leiden: A Schuerwegh.*

**Portugal** – *Hospitais da Universidade de Coimbra, Coimbra: L Santos; Hospital Curry Cabral, Lisbon: AC Rodrigues, A Grilo; Hospital Fernando Fonseca, Lisbon: MC Amaral.*

**Spain** – *Hospital Universitario La Fe, Valencia: JA Román Ivorra; Hospital de la Santa Creu i Sant Pau, Barcelona: I Castellvi.*

**Switzerland** – *Universitäts-Spital Zürich, Zürich: O Distler; Centre Hospitalier Universitaire Vaudoise, Lausanne: F Spertini; Kantonspital Sankt Gallen, St Gallen: R Müller.*

**Turkey** – *Istanbul Üniversitesi İstanbul Tıp Fakültesi, İstanbul: M Inanç; Ege Üniversitesi Tıp Fakültesi, İzmir: F Oksel; Ankara Üniversitesi Tıp Fakültesi İbni Sina Hastanesi, Ankara: N Turkcapar.*

**United Kingdom** – *Hope Hospital, Salford: A Herrick; Royal Free Hospital, London: C Denton; Bath Institute for Rheumatic Diseases, Bath: N McHugh; Wrightington Hospital, Wigan: C Chattopadhyay; Addenbrookes Hospital Cambridge, Cambridge: F Hall; Leeds Teaching Hospitals NHS Trust, Leeds: M Buch.*

### 3. Selection of covariables potentially associated with future development of new digital ulcers through ULR to MLR

Supplementary Table S1. Bundle 1: Demographics

| Variable                                   | Summary statistics   |                      |                         | ULR                                   |                        | Variables selected       |                           |
|--------------------------------------------|----------------------|----------------------|-------------------------|---------------------------------------|------------------------|--------------------------|---------------------------|
|                                            | Cases<br>(N=103)     | Non-cases<br>(N=365) | OR<br>(95% CI)          | Wald Chi-<br>square<br><i>p</i> value | ROC-AUC<br>(95% CI)    | MLR<br>within-<br>bundle | MLR<br>across-<br>bundles |
| <b>Number of variables (V = 14)</b>        |                      |                      |                         |                                       |                        | <b>3</b>                 | <b>1</b>                  |
| 1. Sex                                     |                      |                      |                         |                                       |                        |                          |                           |
| Female, n (%)                              | 79 (76.7)            | 293 (80.3)           | 1.236*<br>(0.732–2.089) | 0.428*                                | 0.518<br>(0.472–0.564) |                          |                           |
| Male, n (%)                                | 24 (23.3)            | 72 (19.7)            |                         |                                       |                        |                          |                           |
| 2. Age at enrollment (years): mean (SD); n | 51.5 (13.9); 103     | 54.8 (13.6); 365     | 0.983<br>(0.967–0.999)  | 0.033                                 | 0.573<br>(0.509–0.636) | X                        | X                         |
| 3. Race                                    |                      |                      |                         |                                       |                        |                          |                           |
| White/Caucasian, n (%)                     | 98 (95.1)            | 346 (94.8)           | 0.929<br>(0.338–2.552)  | 0.887                                 | 0.502<br>(0.478–0.526) |                          |                           |
| Other, n (%)                               | 5 (4.9)              | 19 (5.2)             |                         |                                       |                        |                          |                           |
| 4. Height <sup>†</sup> (cm): mean (SD), n  | 166.4 (10.2);<br>102 | 164.3 (8.5);<br>363  | 1.026<br>(1.002–1.052)  | 0.035                                 | 0.559<br>(0.493–0.625) |                          |                           |

| Variable                                             | Summary statistics |                      | ULR                                 |                                       |                        | Variables selected       |                           |
|------------------------------------------------------|--------------------|----------------------|-------------------------------------|---------------------------------------|------------------------|--------------------------|---------------------------|
|                                                      | Cases<br>(N=103)   | Non-cases<br>(N=365) | OR<br>(95% CI)                      | Wald Chi-<br>square<br><i>p</i> value | ROC-AUC<br>(95% CI)    | MLR<br>within-<br>bundle | MLR<br>across-<br>bundles |
| 5. Weight (kg), mean (SD); n                         | 65.9 (13.2); 102   | 65.5 (14.2); 364     | 1.002<br>(0.987–1.018)              | 0.790                                 | 0.516<br>(0.452–0.579) |                          |                           |
| 6. Body surface area (m <sup>2</sup> ), mean (SD); n | 1.7 (0.2); 102     | 1.7 (0.2); 363       | 1.552<br>(0.553–4.357)              | 0.404                                 | 0.529<br>(0.465–0.594) |                          |                           |
| 7. Manual labor <sup>†</sup> , yes, n/N (%)          | 13/103 (12.6)      | 71/365 (19.5)        | 0.598<br>(0.316–1.131)              | 0.114                                 | 0.534<br>(0.496–0.572) |                          |                           |
| 8. Smoking behavior,                                 |                    |                      |                                     |                                       |                        |                          |                           |
| Never, n/N (%)                                       | 63/103 (61.2)      | 234/365 (64.1)       |                                     |                                       |                        |                          |                           |
| Past, not current, n/N (%)                           | 19/103 (18.4)      | 82/365 (22.5)        | 0.861 <sup>‡</sup><br>(0.486–1.524) | 0.607 <sup>‡</sup>                    | 0.544<br>(0.489–0.600) |                          |                           |
| Current, n/N (%)                                     | 21/103 (20.4)      | 49/365 (13.4)        | 1.592 <sup>§</sup><br>(0.889–2.849) | 0.117 <sup>§</sup>                    |                        |                          |                           |
| 9. Currently smoking, n/N (%)                        | 21/103 (20.4)      | 49/365 (13.4)        | 1.652<br>(0.938–2.909)              | 0.082                                 | 0.535<br>(0.492–0.578) | X                        |                           |



| Variable                                      | Summary statistics |                      |                                     | ULR                                   |                        | Variables selected       |                           |
|-----------------------------------------------|--------------------|----------------------|-------------------------------------|---------------------------------------|------------------------|--------------------------|---------------------------|
|                                               | Cases<br>(N=103)   | Non-cases<br>(N=365) | OR<br>(95% CI)                      | Wald Chi-<br>square<br><i>p</i> value | ROC-AUC<br>(95% CI)    | MLR<br>within-<br>bundle | MLR<br>across-<br>bundles |
| 10. Cigarette packs per day, mean (SD); n     | 0.24 (0.41); 100   | 0.28 (0.48); 356     | 0.804<br>(0.490–1.322)              | 0.390                                 | 0.509<br>(0.457–0.561) |                          |                           |
| 11. Years smoking, mean (SD); n               | 7.8 (12.7); 99     | 7.3 (13.4); 353      | 1.003<br>(0.986–1.020)              | 0.755                                 | 0.512<br>(0.457–0.567) |                          |                           |
| 12. Smoking Index Duration, mean (SD); n      | 5.4 (9.6); 99      | 5.7 (10.5); 353      | 0.997<br>(0.975–1.019)              | 0.783                                 | 0.490<br>(0.437–0.543) |                          |                           |
| 13. Comprehensive Smoking Index: mean (SD); n | 0.1 (0.2); 99      | 0.1 (0.3); 351       | – <sup>¶</sup>                      | 0.032                                 | 0.535<br>(0.480–0.590) | X                        |                           |
| 14. Hand dominancy                            |                    |                      |                                     |                                       |                        |                          |                           |
| Right, n/N (%)                                | 100/103 (97.1)     | 348/365 (95.3)       | 0.614 <sup>†</sup><br>(0.176–2.138) | 0.444 <sup>†</sup>                    | 0.509<br>(0.489–0.528) |                          |                           |
| Left or ambidextrous, n/N (%)                 | 3/103 (2.9)        | 17/365 (4.7)         |                                     |                                       |                        |                          |                           |

Reduction of covariables through Step 1: ULR (Retention criterion:  $p < 0.15$  for linear term or  $p < 0.05$  for quadratic term), Step 2: MLR within-bundle (Entry criterion:  $p < 0.15$ ; Retention criterion:  $p < 0.10$ ), and Step 3: MLR across-bundles (Entry criterion:  $p < 0.15$ ; Retention criterion:  $p < 0.05$ ).

\*Male vs female

<sup>†</sup>Exclusion criterion: Not retained following Step 1 (ULR) based on Steering Committee Decision

<sup>‡</sup>Past, not current vs never smoker

<sup>§</sup>Current vs never smoker

<sup>\*</sup>OR is not given since the functional relationship is quadratic. Associated *p* value and ROC-AUC are of quadratic term

<sup>†</sup>Left/ambidextrous vs right handed

Abbreviations: AUC, area under the curve; CI, confidence interval; MLR, multivariable logistic regression; OR, odds ratio; ROC, receiver operating characteristic; SD, standard deviation; ULR, univariable logistic regression

**Supplementary Table S2. Bundle 2: Systemic sclerosis clinical characteristics**

| Variable                                                                                                      | Summary statistics |                  |                        | ULR            |                        | Variables selected |          |
|---------------------------------------------------------------------------------------------------------------|--------------------|------------------|------------------------|----------------|------------------------|--------------------|----------|
|                                                                                                               | Cases              | Non-cases        | OR                     | Wald Chi-      | ROC-AUC                | MLR                | MLR      |
|                                                                                                               | (N=103)            | (N=365)          | (95% CI)               | square         | (95% CI)               | within-            | across-  |
|                                                                                                               |                    |                  |                        | <i>p</i> value |                        | bundle             | bundles  |
| <b>Number of variables (V = 30)</b>                                                                           |                    |                  |                        |                |                        | <b>6</b>           | <b>3</b> |
| 1. Age at first Raynaud's phenomenon (years): mean (SD); n                                                    | 39.2 (16.0); 103   | 40.9 (14.2); 361 | 0.992<br>(0.977–1.007) | 0.299          | 0.542<br>(0.476–0.609) |                    |          |
| 2. Years since first Raynaud's phenomenon: mean (SD); n                                                       | 12.4 (12.0); 103   | 13.9 (11.7); 361 | 0.988<br>(0.969–1.008) | 0.241          | 0.557<br>(0.494–0.619) |                    |          |
| 3. Age at first physician-documented non-Raynaud's clinical feature* (years): mean (SD); n                    | 43.1 (14.8); 103   | 45.6 (13.6); 363 | 0.987<br>(0.971–1.003) | 0.106          | 0.561<br>(0.496–0.626) | X                  | X        |
| 4. Years since first physician-documented non-Raynaud's clinical feature*: mean (SD); n                       | 8.5 (7.0); 103     | 9.4 (8.4); 363   | 0.987<br>(0.959–1.015) | 0.362          | 0.514<br>(0.452–0.575) |                    |          |
| 5. Years between first Raynaud's and first physician-documented non-Raynaud's clinical feature*: mean (SD); n | 4.3 (9.5); 103     | 4.9 (8.8); 359   | 0.991<br>(0.966–1.018) | 0.523          | 0.564<br>(0.501–0.626) |                    |          |

| Variable                                                          | Summary statistics |                      | ULR                                 |                                       |                        | Variables selected       |                           |
|-------------------------------------------------------------------|--------------------|----------------------|-------------------------------------|---------------------------------------|------------------------|--------------------------|---------------------------|
|                                                                   | Cases<br>(N=103)   | Non-cases<br>(N=365) | OR<br>(95% CI)                      | Wald Chi-<br>square<br><i>p</i> value | ROC-AUC<br>(95% CI)    | MLR<br>within-<br>bundle | MLR<br>across-<br>bundles |
| 6. SSc subtype                                                    |                    |                      |                                     |                                       |                        |                          |                           |
| Diffuse cutaneous SSc, n/N (%)                                    | 48/103 (46.6)      | 140/365 (38.4)       | 0.713 <sup>†</sup><br>(0.459–1.108) | 0.133 <sup>†</sup>                    | 0.541<br>(0.487–0.596) | X                        |                           |
| Limited cutaneous SSc, n/N (%)                                    | 55/103 (53.4)      | 225/365 (61.6)       |                                     |                                       |                        |                          |                           |
| 7. Extent of skin involvement (modified mRSS), mean (SD); n       |                    |                      |                                     |                                       |                        |                          |                           |
|                                                                   | 13.0 (9.0); 100    | 11.3 (8.4); 354      | 1.023<br>(0.998–1.048)              | 0.076                                 | 0.562<br>(0.496–0.627) | X                        |                           |
| 8. Sclerodactyly, yes, n/N (%)                                    |                    |                      |                                     |                                       |                        |                          |                           |
|                                                                   | 94/103 (91.3)      | 319/365 (87.4)       | 1.505<br>(0.711–3.188)              | 0.285                                 | 0.519<br>(0.487–0.552) |                          |                           |
| Organ involvement (of the below mentioned variables)              |                    |                      |                                     |                                       |                        |                          |                           |
| 9. Any organ involvement                                          |                    |                      |                                     |                                       |                        |                          |                           |
| 10. Kidney involvement: proteinuria, n/N (%)                      |                    |                      |                                     |                                       |                        |                          |                           |
|                                                                   | 7/103 (6.8)        | 31/365 (8.5)         | 0.786<br>(0.335–1.840)              | 0.579                                 | 0.509<br>(0.480–0.537) |                          |                           |
| 11. Kidney involvement: SSc renal crisis, kidney failure, n/N (%) |                    |                      |                                     |                                       |                        |                          |                           |
|                                                                   | 2/103 (1.9)        | 22/365 (6.0)         | 0.309<br>(0.071–1.336)              | 0.116                                 | 0.520<br>(0.502–0.539) | X                        | X                         |
| 12. Heart involvement, n/N (%)                                    |                    |                      |                                     |                                       |                        |                          |                           |
|                                                                   | 22/103 (21.4)      | 55/365 (15.1)        | 1.531<br>(0.882–2.658)              | 0.130                                 | 0.532<br>(0.488–0.575) | X                        | X                         |

| Variable                                                        | Summary statistics |                |                        | ULR                      |                        | Variables selected |                    |
|-----------------------------------------------------------------|--------------------|----------------|------------------------|--------------------------|------------------------|--------------------|--------------------|
|                                                                 | Cases              | Non-cases      | OR                     | Wald Chi-                | ROC-AUC                | MLR                | MLR                |
|                                                                 | (N=103)            | (N=365)        | (95% CI)               | square<br><i>p</i> value | (95% CI)               | within-<br>bundle  | across-<br>bundles |
| 13. Lung involvement – pulmonary arterial hypertension, n/N (%) | 19/103 (18.4)      | 63/365 (17.3)  | 1.084<br>(0.615–1.912) | 0.780                    | 0.506<br>(0.464–0.548) |                    |                    |
| 14. Lung interstitial disease or respiratory failure, n/N (%)   | 46/103 (44.7)      | 157/365 (43.0) | 1.069<br>(0.688–1.661) | 0.766                    | 0.508<br>(0.454–0.563) |                    |                    |
| 15. Gastrointestinal tract, n/N (%)                             | 71/103 (68.9)      | 241/365 (66.0) | 1.142<br>(0.713–1.827) | 0.581                    | 0.515<br>(0.464–0.566) |                    |                    |
| 16. Muscles, n/N (%)                                            | 13/103 (12.6)      | 45/365 (12.3)  | 1.027<br>(0.531–1.988) | 0.936                    | 0.502<br>(0.465–0.538) |                    |                    |
| 17. Joint involvement, n/N (%)                                  | 45/103 (43.7)      | 127/365 (34.8) | 1.454<br>(0.932–2.269) | 0.099                    | 0.545<br>(0.491–0.599) | X                  |                    |
| 18. Pleural effusion, n/N (%)                                   | 8/103 (7.8)        | 19/365 (5.2)   | 1.534<br>(0.651–3.613) | 0.328                    | 0.513<br>(0.484–0.541) |                    |                    |
| 19. Nervous system <sup>‡</sup> , n/N (%)                       | 4/103 (3.9)        | 7/365 (1.9)    | 2.066<br>(0.593–7.202) | 0.255                    | 0.510<br>(0.490–0.530) |                    |                    |

| Variable                                                                | Summary statistics |                      | ULR                     |                                       |                        | Variables selected       |                           |
|-------------------------------------------------------------------------|--------------------|----------------------|-------------------------|---------------------------------------|------------------------|--------------------------|---------------------------|
|                                                                         | Cases<br>(N=103)   | Non-cases<br>(N=365) | OR<br>(95% CI)          | Wald Chi-<br>square<br><i>p</i> value | ROC-AUC<br>(95% CI)    | MLR<br>within-<br>bundle | MLR<br>across-<br>bundles |
| 20. Any other organ system involvement<br>other than the above, n/N (%) | 3/103 (2.9)        | 21/365 (5.8)         | 0.491<br>(0.144–1.681)  | 0.258                                 | 0.514<br>(0.494–0.534) |                          |                           |
| (Connective) tissue disease                                             |                    |                      |                         |                                       |                        |                          |                           |
| 21. Systemic lupus erythematosus <sup>‡</sup> , n/N<br>(%)              | 3/103 (2.9)        | 13/365 (3.6)         | 0.812<br>(0.227–2.907)  | 0.749                                 | 0.503<br>(0.484–0.522) |                          |                           |
| 22. Sjogren's syndrome, n/N (%)                                         | 7/103 (6.8)        | 42/365 (11.5)        | 0.561<br>(0.244–1.289)  | 0.173                                 | 0.524<br>(0.494–0.553) |                          |                           |
| 23. Dermatomyositis <sup>‡</sup> , n/N (%)                              | 2/103 (1.9)        | 1/365 (0.3)          | 7.208<br>(0.647–80.301) | 0.108                                 | 0.508<br>(0.495–0.522) |                          |                           |
| 24. Polymyositis <sup>‡</sup> , n/N (%)                                 | 3/103 (2.9)        | 6/365 (1.6)          | 1.795<br>(0.441–7.305)  | 0.414                                 | 0.506<br>(0.489–0.524) |                          |                           |
| 25. Rheumatoid arthritis, n/N (%)                                       | 6/103 (5.8)        | 16/365 (4.4)         | 1.349<br>(0.514–3.541)  | 0.543                                 | 0.507<br>(0.482–0.532) |                          |                           |
| 26. Marfan syndrome <sup>‡</sup> , n/N (%)                              | 0/103 (0.0)        | 0/365 (0.0)          | –                       | –                                     | –                      |                          |                           |
| 27. Ehlers-Danlos syndrome <sup>‡</sup> , n/N (%)                       | 0/103 (0.0)        | 1/365 (0.3)          | 0.000<br>(0.000–+Inf)   | 0.989                                 | 0.501<br>(0.499–0.504) |                          |                           |

| Variable                                                                                     | Summary statistics |                      |                         | ULR                                   |                        | Variables selected       |                           |
|----------------------------------------------------------------------------------------------|--------------------|----------------------|-------------------------|---------------------------------------|------------------------|--------------------------|---------------------------|
|                                                                                              | Cases<br>(N=103)   | Non-cases<br>(N=365) | OR<br>(95% CI)          | Wald Chi-<br>square<br><i>p</i> value | ROC-AUC<br>(95% CI)    | MLR<br>within-<br>bundle | MLR<br>across-<br>bundles |
| 28. Osteogenesis imperfecta <sup>‡</sup> , n/N (%)                                           | 1/103 (1.0)        | 1/365 (0.3)          | 3.569<br>(0.221–57.554) | 0.370                                 | 0.504<br>(0.494–0.513) |                          |                           |
| 29. Stickler syndrome <sup>‡</sup> , n/N (%)                                                 | 0/103 (0.0)        | 0/365 (0.0)          | –                       | –                                     | –                      |                          |                           |
| 30. Any other (connective) tissue disease<br>than the above mentioned <sup>‡</sup> , n/N (%) | 2/103 (1.9)        | 6/365 (1.6)          | 1.185<br>(0.236–5.960)  | 0.837                                 | 0.502<br>(0.487–0.516) |                          |                           |

Reduction of covariables through Step 1: ULR (Retention criterion:  $p < 0.15$  for linear term or  $p < 0.05$  for quadratic term), Step 2: MLR within-bundle (Entry criterion:  $p < 0.15$ ; Retention criterion:  $p < 0.10$ ), and Step 3: MLR across-bundles (Entry criterion:  $p < 0.15$ ; Retention criterion:  $p < 0.05$ ).

\*Potential non-Raynaud's clinical features: swollen hands, face or feet, skin thickening, multiple digital and facial telangiectasia, digital ulcers, arthritis, calcinosis, flexion contractures, myositis, sicca syndrome, kidney involvement, heart involvement, lung involvement, gut involvement, esophagus involvement, pleura involvement, pericardium involvement, pleura involvement, CNS involvement, and other

<sup>†</sup>Limited vs diffuse SSc

<sup>‡</sup>Exclusion Criterion: Not retained following Step 1(ULR) due to a frequency of fewer than 20 patients

Abbreviations: AUC, area under the curve; CI, confidence interval; CNS, central nervous system; mRSS, Modified Rodnan Skin Score; MLR, multivariable logistic regression; OR, odds ratio; ROC, receiver operating characteristic; SD, standard deviation; SSc, systemic sclerosis; ULR, univariable logistic regression

**Supplementary Table S3. Bundle 3: Digital ulcer characteristics**

| Variable                                   | Summary statistics |                |                          | ULR             |                        | Variables selected |                    |
|--------------------------------------------|--------------------|----------------|--------------------------|-----------------|------------------------|--------------------|--------------------|
|                                            | Cases              | Non-cases      | OR                       | Wald Chi-square | ROC-AUC                | MLR                | MLR                |
|                                            | (N=103)            | (N=365)        | (95% CI)                 | <i>p</i> value  | (95% CI)               | within-<br>bundle  | across-<br>bundles |
| <b>Number of variables (V = 24)</b>        |                    |                |                          |                 |                        | <b>8</b>           | <b>3</b>           |
| 1. Number of DUs, n/N (%)                  |                    |                |                          |                 |                        |                    |                    |
| 0                                          | 41 /103 (39.8)     | 262/365 (71.8) |                          |                 |                        |                    |                    |
| 1                                          | 24/103 (23.3)      | 57/365 (15.6)  | 2.691*<br>(1.507–4.803)  | 0.001*          | 0.678                  | X                  | X                  |
| 2                                          | 16/103 (15.5)      | 27/365 (7.4)   | 3.787†<br>(1.879–7.630)  | <0.001†         | (0.622–0.734)          |                    |                    |
| ≥3                                         | 22/103 (21.4)      | 19/365 (5.2)   | 7.399‡<br>(3.687–14.848) | <0.001‡         |                        |                    |                    |
| 2. Presence of DUs§, n/N (%)               | 62/103 (60.2)      | 103/365 (28.2) | 3.847<br>(2.439–6.067)   | <0.001          | 0.660<br>(0.607–0.713) |                    |                    |
| 3. At least one DU in fingertips§, n/N (%) | 33/103 (32.0)      | 54/365 (14.8)  | 2.715<br>(1.639–4.498)   | <0.001          | 0.586<br>(0.537–0.635) |                    |                    |

| Variable                                                   | Summary statistics |                |                         | ULR             |                        | Variables selected |                    |
|------------------------------------------------------------|--------------------|----------------|-------------------------|-----------------|------------------------|--------------------|--------------------|
|                                                            | Cases              | Non-cases      | OR                      | Wald Chi-square | ROC-AUC                | MLR                | MLR                |
|                                                            | (N=103)            | (N=365)        | (95% CI)                | <i>p</i> value  | (95% CI)               | within-<br>bundle  | across-<br>bundles |
| 4. At least one DU in finger joints <sup>§</sup> , n/N (%) | 17/103 (16.5)      | 12/365 (3.3)   | 5.814<br>(2.677–12.628) | <0.001          | 0.566<br>(0.529–0.603) |                    |                    |
| Previous complications                                     |                    |                |                         |                 |                        |                    |                    |
| 5. Soft tissue infection requiring antibiotics             | 52/103 (50.5)      | 142/361 (39.3) | 1.594<br>(1.027–2.475)  | 0.038           | 0.557<br>(0.503–0.612) | X                  |                    |
| 6. Auto-amputation, n/N (%)                                | 13/103 (12.6)      | 14/365 (3.8)   | 3.621<br>(1.644–7.977)  | 0.001           | 0.544<br>(0.510–0.578) | X                  | X                  |
| 7. Critical digital ischemia, n/N (%)                      | 35/103 (34.0)      | 94/362 (26.0)  | 1.473<br>(0.920–2.358)  | 0.107           | 0.540<br>(0.489–0.592) | X                  |                    |
| 8. Gangrene, n/N (%)                                       | 16/103 (15.5)      | 37/365 (10.1)  | 1.630<br>(0.866–3.068)  | 0.130           | 0.527<br>(0.489–0.565) | X                  |                    |
| 9. Osteomyelitis, n/N (%)                                  | 7/102 (6.9)        | 16/364 (4.4)   | 1.591<br>(0.636–3.979)  | 0.320           | 0.512<br>(0.486–0.539) |                    |                    |
| Current (at enrollment) complications                      |                    |                |                         |                 |                        |                    |                    |
| 10. Soft tissue infection requiring antibiotics, n/N (%)   | 23/103 (22.3)      | 24/365 (6.6)   | 4.085<br>(2.194–7.606)  | <0.001          | 0.579<br>(0.536–0.621) | X                  |                    |



| Variable                                                               | Summary statistics |                | ULR                     |                 |                        | Variables selected |                    |
|------------------------------------------------------------------------|--------------------|----------------|-------------------------|-----------------|------------------------|--------------------|--------------------|
|                                                                        | Cases              | Non-cases      | OR                      | Wald Chi-square | ROC-AUC                | MLR                | MLR                |
|                                                                        | (N=103)            | (N=365)        | (95% CI)                | <i>p</i> value  | (95% CI)               | within-<br>bundle  | across-<br>bundles |
| 11. Critical digital ischemia                                          | 15/103 (14.6)      | 12/365 (3.3)   | 5.014<br>(2.266–11.094) | <0.0001         | 0.556<br>(0.521–0.592) | X                  | X                  |
| Previous or current complications                                      |                    |                |                         |                 |                        |                    |                    |
| 12. Soft tissue infection requiring antibiotics <sup>§</sup> , n/N (%) | 57/103 (55.3)      | 143/365 (39.2) | 1.924<br>(1.237–2.992)  | 0.004           | 0.581<br>(0.526–0.635) |                    |                    |
| 13. Auto-amputation <sup>§</sup> , n/N (%)                             | 13/103 (12.6)      | 15/365 (4.1)   | 3.370<br>(1.548–7.338)  | 0.002           | 0.543<br>(0.509–0.576) |                    |                    |
| 14. Critical digital ischemia <sup>§</sup> , n/N (%)                   | 39/103 (37.9)      | 98/365 (26.8)  | 1.661<br>(1.048–2.632)  | 0.031           | 0.555<br>(0.503–0.607) |                    |                    |
| 15. Gangrene <sup>§</sup> , n/N (%)                                    | 17/103 (16.5)      | 38/365 (10.4)  | 1.701<br>(0.916–3.160)  | 0.093           | 0.531<br>(0.491–0.570) |                    |                    |
| 16. Osteomyelitis, n/N (%)                                             | 7/103 (6.8)        | 16/365 (4.4)   | 1.591<br>(0.636–3.979)  | 0.320           | 0.512<br>(0.486–0.539) |                    |                    |

| Variable                                                        | Summary statistics |                |                         | ULR             |                        | Variables selected |                    |
|-----------------------------------------------------------------|--------------------|----------------|-------------------------|-----------------|------------------------|--------------------|--------------------|
|                                                                 | Cases              | Non-cases      | OR                      | Wald Chi-square | ROC-AUC                | MLR                | MLR                |
|                                                                 | (N=103)            | (N=365)        | (95% CI)                | <i>p</i> value  | (95% CI)               | within-<br>bundle  | across-<br>bundles |
| 17. Any current or previous complication <sup>§</sup> , n/N (%) | 71/103 (68.9)      | 194/365 (53.2) | 1.956<br>(1.228–3.114)  | 0.005           | 0.579<br>(0.527–0.631) |                    |                    |
| Previous DU-associated interventions                            |                    |                |                         |                 |                        |                    |                    |
| 18. Hospitalization for DUs, n/N (%)                            | 55/103 (53.4)      | 144/365 (39.5) | 1.759<br>(1.132–2.732)  | 0.012           | 0.570<br>(0.515–0.624) | X                  |                    |
| 19. Surgical amputation, n/N (%)                                | 6/103 (5.8)        | 20/364 (5.5)   | 1.064<br>(0.416–2.723)  | 0.897           | 0.502<br>(0.476–0.527) |                    |                    |
| 20. Other intervention, n/N (%)                                 | 7/103 (6.8)        | 23/362 (6.4)   | 1.075<br>(0.448–2.580)  | 0.872           | 0.502<br>(0.475–0.530) |                    |                    |
| Current DU-associated interventions                             |                    |                |                         |                 |                        |                    |                    |
| 21. Wound debridement <sup>§</sup> , n/N (%)                    | 14/99 (14.1)       | 11/311 (3.5)   | 4.492<br>(1.967–10.256) | <0.001          | 0.553<br>(0.517–0.589) |                    |                    |
| 22. Antiseptics <sup>§</sup> , n/N (%)                          | 21/99 (21.2)       | 32/311 (10.3)  | 2.347<br>(1.282–4.299)  | 0.006           | 0.555<br>(0.511–0.599) |                    |                    |
| 23. Supportive gels/creams <sup>§</sup> , n/N (%)               | 24/99 (24.2)       | 35/311 (11.3)  | 2.523<br>(1.415–4.501)  | 0.002           | 0.565<br>(0.519–0.611) |                    |                    |

| Variable                                                        | Summary statistics |                      |                        | ULR                               |                        | Variables selected       |                           |
|-----------------------------------------------------------------|--------------------|----------------------|------------------------|-----------------------------------|------------------------|--------------------------|---------------------------|
|                                                                 | Cases<br>(N=103)   | Non-cases<br>(N=365) | OR<br>(95% CI)         | Wald Chi-square<br><i>p</i> value | ROC-AUC<br>(95% CI)    | MLR<br>within-<br>bundle | MLR<br>across-<br>bundles |
| 24. Any current or previous intervention <sup>§</sup> , n/N (%) | 68/103 (66.0)      | 178/365 (48.8)       | 2.041<br>(1.293–3.222) | 0.002                             | 0.586<br>(0.534–0.639) |                          |                           |

Reduction of covariables through Step 1: ULR (Retention criterion:  $p < 0.15$  for linear term or  $p < 0.05$  for quadratic term), Step 2: MLR within-bundle (Entry criterion:  $p < 0.15$ ; Retention criterion:  $p < 0.10$ ), and Step 3: MLR across-bundles (Entry criterion:  $p < 0.15$ ; Retention criterion:  $p < 0.05$ ).

\*1 vs 0 DUs

†2 vs 0 DUs

‡ $\geq 3$  vs 0 DUs

§Exclusion criterion: Not retained following Step 1 (ULR) based on Steering Committee Decision

Abbreviations: AUC, area under the curve; CI, confidence interval; DU, digital ulcer; MLR, multivariable logistic regression; OR, odds ratio; ROC, receiver operating characteristic; SD, standard deviation; ULR, univariable logistic regression

**Supplementary Table S4. Bundle 4: Other clinical characteristics**

| Variable                                          | Summary statistics |                      |                                     | ULR                                      |                        | Variables selected       |                           |
|---------------------------------------------------|--------------------|----------------------|-------------------------------------|------------------------------------------|------------------------|--------------------------|---------------------------|
|                                                   | Cases<br>(N=103)   | Non-cases<br>(N=365) | OR<br>(95% CI)                      | Wald<br>Chi-<br>square<br><i>p</i> value | ROC-AUC<br>(95% CI)    | MLR<br>within-<br>bundle | MLR<br>across-<br>bundles |
| <b>Number of variables (V = 16)</b>               |                    |                      |                                     |                                          |                        | <b>3</b>                 | <b>1</b>                  |
| 1. Known peripheral arterial disease,<br>n/N (%)  | 3/103 (2.9)        | 23/365 (6.3)         | 0.446<br>(0.131–1.516)              | 0.196                                    | 0.517<br>(0.496–0.538) |                          |                           |
| 2. Diabetes, n/N (%)                              | 2/103 (1.9)        | 19/365 (5.2)         | 0.361<br>(0.083–1.575)              | 0.175                                    | 0.516<br>(0.499–0.534) |                          |                           |
| 3. Other relevant concomitant disease,<br>n/N (%) | 38/103 (36.9)      | 145/365 (39.7)       | 0.887<br>(0.565–1.394)              | 0.603                                    | 0.514<br>(0.461–0.567) |                          |                           |
| Allen test                                        |                    |                      |                                     |                                          |                        |                          |                           |
| 4. Number of abnormal hands*, n/N<br>(%)          |                    |                      |                                     |                                          |                        |                          |                           |
| 0                                                 | 61/95 (64.2)       | 226/338 (66.9)       |                                     |                                          |                        |                          |                           |
| 1                                                 | 2/95 (2.1)         | 27/338 (8.0)         | 0.274 <sup>†</sup><br>(0.063–1.186) | 0.083 <sup>†</sup>                       | 0.561<br>(0.508–0.615) |                          |                           |
| 2                                                 | 32/95 (33.7)       | 85/338 (25.1)        | 1.395 <sup>‡</sup><br>(0.850–2.289) | 0.188 <sup>‡</sup>                       |                        |                          |                           |

| Variable                         | Summary statistics |                      |                        | ULR                                      |                        | Variables selected       |                           |
|----------------------------------|--------------------|----------------------|------------------------|------------------------------------------|------------------------|--------------------------|---------------------------|
|                                  | Cases<br>(N=103)   | Non-cases<br>(N=365) | OR<br>(95% CI)         | Wald<br>Chi-<br>square<br><i>p</i> value | ROC-AUC<br>(95% CI)    | MLR<br>within-<br>bundle | MLR<br>across-<br>bundles |
| 5. Both hands abnormal, n/N (%)  | 32/95 (33.7)       | 85/338 (25.1)        | 0.661<br>(0.405–1.081) | 0.099                                    | 0.543<br>(0.490–0.596) | X                        |                           |
| 6. Either hand abnormal, n/N (%) | 34/95 (35.8)       | 112/338 (33.1)       | 0.889<br>(0.552–1.432) | 0.629                                    | 0.513<br>(0.459–0.568) |                          |                           |
| 7. Left hand abnormal, n/N (%)   | 33/96 (34.4)       | 96/338 (28.4)        | 1.320<br>(0.815–2.140) | 0.259                                    | 0.530<br>(0.476–0.583) |                          |                           |
| 8. Right hand abnormal, n/N (%)  | 33/95 (34.7)       | 101/338 (29.9)       | 1.249<br>(0.771–2.023) | 0.366                                    | 0.524<br>(0.470–0.578) |                          |                           |
| Digital lesions other than DUs   |                    |                      |                        |                                          |                        |                          |                           |
| Fissure                          |                    |                      |                        |                                          |                        |                          |                           |
| 9. Presence, n/N (%)             | 17/103 (16.5)      | 54/365 (14.8)        | 1.258<br>(0.708–2.236) | 0.433                                    | 0.516<br>(0.474–0.558) |                          |                           |
| 10. Number, mean (SD); n         | 3.1 (2.9); 17      | 3.1 (2.5); 54        | 1.022<br>(0.887–1.177) | 0.764                                    | 0.508<br>(0.467–0.549) |                          |                           |

| Variable                  | Summary statistics |                      |                        | ULR                                      |                        | Variables selected       |                           |
|---------------------------|--------------------|----------------------|------------------------|------------------------------------------|------------------------|--------------------------|---------------------------|
|                           | Cases<br>(N=103)   | Non-cases<br>(N=365) | OR<br>(95% CI)         | Wald<br>Chi-<br>square<br><i>p</i> value | ROC-AUC<br>(95% CI)    | MLR<br>within-<br>bundle | MLR<br>across-<br>bundles |
| <b>Paronychia</b>         |                    |                      |                        |                                          |                        |                          |                           |
| 11. Presence, n/N (%)     | 20/103 (19.4)      | 38/365 (10.4)        | 2.048<br>(1.132–3.705) | 0.018                                    | 0.545<br>(0.503–0.586) | X                        | X                         |
| 12. Number, mean (SD); n  | 2.5 (2.9); 20      | 2.9 (1.9); 38        | 1.112<br>(0.948–1.304) | 0.192                                    | 0.541<br>(0.500–0.582) |                          |                           |
| <b>Pitting scars</b>      |                    |                      |                        |                                          |                        |                          |                           |
| 13. Presence, n/N (%)     | 60/103 (58.3)      | 182/365 (49.9)       | 1.498<br>(0.958–2.342) | 0.076                                    | 0.550<br>(0.496–0.604) | X                        |                           |
| 14. Number*, mean (SD); n | 4.2 (3.0); 60      | 3.9 (3.6); 182       | 1.049<br>(0.985–1.118) | 0.133                                    | 0.564<br>(0.502–0.626) |                          |                           |
| <b>Calcinosis</b>         |                    |                      |                        |                                          |                        |                          |                           |
| 15. Presence, n/N (%)     | 21/103 (20.4)      | 67/365 (18.4)        | 1.090<br>(0.637–1.866) | 0.753                                    | 0.507<br>(0.462–0.552) |                          |                           |
| 16. Number, mean (SD); n  | 2.9 (2.5); 21      | 3.2 (3.3); 67        | 0.995<br>(0.882–1.122) | 0.930                                    | 0.491<br>(0.447–0.536) |                          |                           |

Reduction of covariables through Step 1: ULR (Retention criterion:  $p < 0.15$  for linear term or  $p < 0.05$  for quadratic term), Step 2: MLR within-bundle (Entry criterion:  $p < 0.15$ ; Retention criterion:  $p < 0.10$ ), and Step 3: MLR across-bundles (Entry criterion:  $p < 0.15$ ; Retention criterion:  $p < 0.05$ )

\*Exclusion criterion: Not retained following Step 1 (ULR) based on Steering Committee Decision

<sup>†</sup>1 vs 0 abnormal hands (Allen test)

<sup>‡</sup>2 vs 0 abnormal hands (Allen test)

Abbreviations: AUC, area under the curve; CI, confidence interval; DU, digital ulcer; MLR, multivariable logistic regression; OR, odds ratio; ROC, receiver operating characteristic; SD, standard deviation; ULR, univariable logistic regression

**Supplementary Table S5. Bundle 5: Nailfold videocapillaroscopic characteristics: quantitative assessment (6 sub-bundles)**

| Variable                                                             | Summary statistics      |                         |                        | ULR                      |                        | Variables selected |                    |
|----------------------------------------------------------------------|-------------------------|-------------------------|------------------------|--------------------------|------------------------|--------------------|--------------------|
|                                                                      | Cases                   | Non-cases               | OR                     | Wald Chi-                | ROC-AUC                | MLR                | MLR                |
|                                                                      | (N=103)<br>mean (SD); n | (N=365)<br>mean (SD); n | (95% CI)               | square<br><i>p</i> value | (95% CI)               | within-<br>bundle  | across-<br>bundles |
|                                                                      |                         |                         |                        |                          |                        | <b>31</b>          | <b>3</b>           |
| <b>Patient level (V = 6): both hands, 8 fingers (Sub-bundle 5.1)</b> |                         |                         |                        |                          |                        |                    |                    |
| 1. Number of capillaries/mm*                                         | 4.2 (1.6); 103          | 4.8 (1.8); 362          | 0.800<br>(0.696–0.920) | 0.002                    | 0.605<br>(0.546–0.665) | X                  |                    |
| 2. Number of giants/mm                                               | 0.6 (0.7); 103          | 0.5 (0.6); 362          | 1.055<br>(0.755–1.474) | 0.753                    | 0.506<br>(0.445–0.568) |                    |                    |
| 3. Number of irregularly enlarged capillaries/mm                     | 1.3 (1.0); 103          | 1.3 (1.1); 362          | 0.975<br>(0.795–1.196) | 0.810                    | 0.502<br>(0.437–0.566) |                    |                    |
| 4. Number of microhemorrhages/mm                                     | 0.2 (0.3); 103          | 0.2 (0.3); 362          | 0.543<br>(0.249–1.183) | 0.124                    | 0.565<br>(0.506–0.625) | X                  |                    |
| 5. Number of neoangiogeneses/mm*                                     | 0.7 (0.7); 103          | 0.5 (0.6); 362          | 1.529<br>(1.093–2.140) | 0.013                    | 0.572<br>(0.507–0.636) | X                  |                    |

| Variable                                                             | Summary statistics |                  |                        | ULR            |                        | Variables selected |         |
|----------------------------------------------------------------------|--------------------|------------------|------------------------|----------------|------------------------|--------------------|---------|
|                                                                      | Cases              | Non-cases        | OR                     | Wald Chi-      | ROC-AUC                | MLR                | MLR     |
|                                                                      | (N=103)            | (N=365)          | (95% CI)               | square         | (95% CI)               | within-            | across- |
|                                                                      | mean (SD); n       | mean (SD); n     |                        | <i>p</i> value |                        | bundle             | bundles |
| 6. Maximum capillary diameter                                        | 88.5 (29.6); 85    | 86.2 (27.6); 284 | 0.998<br>(0.991–1.006) | 0.670          | 0.501<br>(0.440–0.562) |                    |         |
| <b>Hand level (V = 6): dominant hand, 4 fingers (Sub-bundle 5.2)</b> |                    |                  |                        |                |                        |                    |         |
| 1. Number of capillaries/mm*                                         | 4.0 (1.7); 101     | 4.7 (1.8); 359   | 0.803<br>(0.701–0.921) | 0.002          | 0.606<br>(0.547–0.665) | X                  |         |
| 2. Number of giants/mm                                               | 0.5 (0.7); 101     | 0.5 (0.7); 359   | 0.991<br>(0.715–1.375) | 0.958          | 0.518<br>(0.455–0.581) |                    |         |
| 3. Number of irregularly enlarged capillaries/mm                     | 1.3 (1.1); 101     | 1.4 (1.2); 359   | 0.955<br>(0.787–1.157) | 0.637          | 0.508<br>(0.443–0.573) |                    |         |
| 4. Number of microhemorrhages/mm                                     | 0.2 (0.4); 101     | 0.2 (0.4); 359   | 0.662<br>(0.348–1.258) | 0.208          | 0.552<br>(0.495–0.609) |                    |         |
| 5. Number of neoangiogeneses/mm                                      | 0.6 (0.7); 101     | 0.5 (0.6); 359   | 1.303<br>(0.946–1.795) | 0.105          | 0.549<br>(0.484–0.613) | X                  |         |
| 6. Maximum capillary diameter                                        | 89.0 (26.7); 67    | 87.1 (29.5); 242 | 0.998<br>(0.992–1.005) | 0.655          | 0.514<br>(0.452–0.577) |                    |         |



| Variable | Summary statistics      |                         | ULR      |                          |          | Variables selected |                    |
|----------|-------------------------|-------------------------|----------|--------------------------|----------|--------------------|--------------------|
|          | Cases                   | Non-cases               | OR       | Wald Chi-                | ROC-AUC  | MLR                | MLR                |
|          | (N=103)<br>mean (SD); n | (N=365)<br>mean (SD); n | (95% CI) | square<br><i>p</i> value | (95% CI) | within-<br>bundle  | across-<br>bundles |

**Hand level (V = 6): non-dominant hand, 4 fingers (Sub-bundle 5.3)**

|                                                  |                 |                  |                        |       |                        |   |
|--------------------------------------------------|-----------------|------------------|------------------------|-------|------------------------|---|
| 1. Number of capillaries/mm*                     | 4.2 (1.7); 101  | 4.9 (1.9); 359   | 0.819<br>(0.719–0.933) | 0.003 | 0.599<br>(0.538–0.659) | X |
| 2. Number of giants/mm                           | 0.6 (0.8); 101  | 0.5 (0.7); 359   | 1.063<br>(0.779–1.450) | 0.699 | 0.524<br>(0.464–0.585) |   |
| 3. Number of irregularly enlarged capillaries/mm | 1.3 (1.1); 101  | 1.3 (1.1); 359   | 0.995<br>(0.816–1.214) | 0.963 | 0.501<br>(0.436–0.566) |   |
| 4. Number of microhemorrhages/mm                 | 0.2 (0.3); 101  | 0.2 (0.4); 359   | 0.612<br>(0.300–1.247) | 0.176 | 0.543<br>(0.485–0.600) |   |
| 5. Number of neoangiogeneses/mm*                 | 0.7 (0.7); 101  | 0.5 (0.6); 359   | 1.501<br>(1.089–2.069) | 0.013 | 0.577<br>(0.513–0.640) | X |
| 6. Maximum capillary diameter                    | 88.6 (35.0); 75 | 87.3 (31.1); 244 | 0.998<br>(0.991–1.005) | 0.593 | 0.497<br>(0.437–0.557) |   |

**Finger level (V = 24): both hands, 4 pairs of fingers (Sub-bundle 5.4)**

**Index fingers**

|                             |                |                |                        |       |                        |   |
|-----------------------------|----------------|----------------|------------------------|-------|------------------------|---|
| 1. Number of capillaries/mm | 4.2 (1.9); 100 | 4.7 (2.1); 353 | 0.879<br>(0.784–0.985) | 0.026 | 0.577<br>(0.516–0.638) | X |
|-----------------------------|----------------|----------------|------------------------|-------|------------------------|---|

| Variable                                         | Summary statistics      |                         | ULR                    |                          |                        | Variables selected |                    |
|--------------------------------------------------|-------------------------|-------------------------|------------------------|--------------------------|------------------------|--------------------|--------------------|
|                                                  | Cases                   | Non-cases               | OR                     | Wald Chi-                | ROC-AUC                | MLR                | MLR                |
|                                                  | (N=103)<br>mean (SD); n | (N=365)<br>mean (SD); n | (95% CI)               | square<br><i>p</i> value | (95% CI)               | within-<br>bundle  | across-<br>bundles |
| 2. Number of giants/mm                           | 0.4 (0.7); 100          | 0.5 (0.7); 353          | 0.936<br>(0.671–1.304) | 0.694                    | 0.518<br>(0.459–0.578) |                    |                    |
| 3. Number of irregularly enlarged capillaries/mm | 1.3 (1.3); 100          | 1.3 (1.3); 353          | 1.018<br>(0.858–1.207) | 0.837                    | 0.511<br>(0.447–0.574) |                    |                    |
| 4. Number of microhemorrhages/mm*                | 0.1 (0.3); 100          | 0.2 (0.4); 353          | 0.418<br>(0.190–0.917) | 0.030                    | 0.575<br>(0.528–0.623) | X                  |                    |
| 5. Number of neoangiogeneses/mm*                 | 0.7 (0.8); 100          | 0.4 (0.6); 353          | 1.616<br>(1.195–2.185) | 0.002                    | 0.587<br>(0.523–0.650) | X                  |                    |
| 6. Maximum capillary diameter                    | 87.2 (33.9); 47         | 85.7 (31.2); 176        | 0.997<br>(0.990–1.004) | 0.382                    | 0.520<br>(0.460–0.579) |                    |                    |
| <b>Middle fingers</b>                            |                         |                         |                        |                          |                        |                    |                    |
| 7. Number of capillaries/mm*                     | 4.0 (1.7); 103          | 4.7 (2.0); 358          | 0.816<br>(0.719–0.926) | 0.002                    | 0.600<br>(0.541–0.659) | X                  |                    |
| 8. Number of giants/mm                           | 0.6 (0.9); 103          | 0.5 (0.7); 358          | 1.198<br>(0.919–1.563) | 0.182                    | 0.532<br>(0.471–0.592) |                    |                    |

| Variable                                          | Summary statistics      |                         | ULR                    |                          |                        | Variables selected |                    |
|---------------------------------------------------|-------------------------|-------------------------|------------------------|--------------------------|------------------------|--------------------|--------------------|
|                                                   | Cases                   | Non-cases               | OR                     | Wald Chi-                | ROC-AUC                | MLR                | MLR                |
|                                                   | (N=103)<br>mean (SD); n | (N=365)<br>mean (SD); n | (95% CI)               | square<br><i>p</i> value | (95% CI)               | within-<br>bundle  | across-<br>bundles |
| 9. Number of irregularly enlarged capillaries/mm  | 1.3 (1.2); 103          | 1.4 (1.2); 358          | 0.971<br>(0.811–1.161) | 0.744                    | 0.510<br>(0.447–0.573) |                    |                    |
| 10. Number of microhemorrhages/mm                 | 0.2 (0.5); 103          | 0.3 (0.5); 358          | 0.810<br>(0.493–1.333) | 0.408                    | 0.529<br>(0.477–0.581) |                    |                    |
| 11. Number of neoangiogeneses/mm                  | 0.6 (0.8); 103          | 0.5 (0.7); 358          | 1.316<br>(0.978–1.769) | 0.070                    | 0.546<br>(0.484–0.607) | X                  |                    |
| 12. Maximum capillary diameter                    | 87.9 (36.1); 63         | 86.5 (29.4); 198        | 1.002<br>(0.997–1.008) | 0.472                    | 0.521<br>(0.461–0.581) |                    |                    |
| <b>Ring fingers</b>                               |                         |                         |                        |                          |                        |                    |                    |
| 13. Number of capillaries/mm                      | 4.2 (1.8); 102          | 4.8 (1.9); 360          | 0.846<br>(0.746–0.959) | 0.009                    | 0.591<br>(0.529–0.652) | X                  |                    |
| 14. Number of giants/mm                           | 0.6 (0.9); 102          | 0.7 (0.9); 360          | 0.923<br>(0.710–1.198) | 0.546                    | 0.524<br>(0.463–0.584) |                    |                    |
| 15. Number of irregularly enlarged capillaries/mm | 1.3 (1.2); 102          | 1.4 (1.3); 360          | 0.953<br>(0.797–1.139) | 0.594                    | 0.509<br>(0.445–0.574) |                    |                    |

| Variable                                          | Summary statistics      |                         | ULR                    |                 |                        | Variables selected |                    |
|---------------------------------------------------|-------------------------|-------------------------|------------------------|-----------------|------------------------|--------------------|--------------------|
|                                                   | Cases                   | Non-cases               | OR                     | Wald Chi-square | ROC-AUC                | MLR                | MLR                |
|                                                   | (N=103)<br>mean (SD); n | (N=365)<br>mean (SD); n | (95% CI)               | <i>p</i> value  | (95% CI)               | within-<br>bundle  | across-<br>bundles |
| 16. Number of microhemorrhages/mm                 | 0.2 (0.4); 102          | 0.3 (0.5); 360          | 0.689<br>(0.397–1.195) | 0.185           | 0.539<br>(0.485–0.593) |                    |                    |
| 17. Number of neoangiogeneses/mm                  | 0.7 (0.9); 102          | 0.6 (0.7); 360          | 1.309<br>(1.001–1.710) | 0.049           | 0.537<br>(0.473–0.600) | X                  |                    |
| 18. Maximum capillary diameter                    | 92.0 (31.9); 63         | 92.4 (35.7); 220        | 0.996<br>(0.991–1.002) | 0.196           | 0.526<br>(0.467–0.586) |                    |                    |
| <b>Little fingers</b>                             |                         |                         |                        |                 |                        |                    |                    |
| 19. Number of capillaries/mm                      | 4.3 (1.8); 102          | 5.0 (1.9); 358          | 0.811<br>(0.714–0.921) | 0.001           | 0.614<br>(0.551–0.677) | X                  |                    |
| 20. Number of giants/mm                           | 0.5 (0.8); 102          | 0.5 (0.7); 358          | 1.077<br>(0.795–1.459) | 0.630           | 0.511<br>(0.452–0.571) |                    |                    |
| 21. Number of irregularly enlarged capillaries/mm | 1.3 (1.2); 102          | 1.2 (1.2); 358          | 1.042<br>(0.865–1.256) | 0.662           | 0.508<br>(0.442–0.574) |                    |                    |
| 22. Number of microhemorrhages/mm                 | 0.2 (0.4); 102          | 0.2 (0.4); 358          | 0.773<br>(0.441–1.353) | 0.367           | 0.527<br>(0.475–0.580) |                    |                    |

| Variable                                                                           | Summary statistics      |                         | ULR                    |                          | Variables selected     |                   |                    |
|------------------------------------------------------------------------------------|-------------------------|-------------------------|------------------------|--------------------------|------------------------|-------------------|--------------------|
|                                                                                    | Cases                   | Non-cases               | OR                     | Wald Chi-                | ROC-AUC                | MLR               | MLR                |
|                                                                                    | (N=103)<br>mean (SD); n | (N=365)<br>mean (SD); n | (95% CI)               | square<br><i>p</i> value | (95% CI)               | within-<br>bundle | across-<br>bundles |
| 23. Number of neoangiogeneses/mm                                                   | 0.7 (0.8); 102          | 0.6 (0.8); 358          | 1.226<br>(0.935–1.607) | 0.140                    | 0.549<br>(0.487–0.612) | X                 |                    |
| 24. Maximum capillary diameter                                                     | 87.8 (26.4); 50         | 85.0 (30.2); 179        | 1.000<br>(0.993–1.006) | 0.880                    | 0.503<br>(0.443–0.563) |                   |                    |
| <b>Finger-level (V = 24): dominant hand, 4 individual fingers (Sub-bundle 5.5)</b> |                         |                         |                        |                          |                        |                   |                    |
| <b>Index fingers</b>                                                               |                         |                         |                        |                          |                        |                   |                    |
| 1. Number of capillaries/mm                                                        | 3.9 (2.2); 89           | 4.5 (2.3); 325          | 0.879<br>(0.787–0.981) | 0.022                    | 0.603<br>(0.538–0.668) | X                 |                    |
| 2. Number of giants/mm                                                             | 0.3 (0.7); 89           | 0.5 (0.8); 325          | 0.785<br>(0.556–1.109) | 0.170                    | 0.547<br>(0.492–0.601) |                   |                    |
| 3. Number of irregularly enlarged capillaries/mm                                   | 1.4 (1.5); 89           | 1.4 (1.4); 325          | 1.038<br>(0.881–1.224) | 0.656                    | 0.508<br>(0.441–0.575) |                   |                    |
| 4. Number of microhemorrhages/mm                                                   | 0.1 (0.4); 89           | 0.2 (0.5); 325          | 0.592<br>(0.305–1.150) | 0.122                    | 0.552<br>(0.512–0.593) | X                 | X                  |
| 5. Number of neoangiogeneses/mm                                                    | 0.6 (0.8); 89           | 0.4 (0.8); 325          | 1.212<br>(0.911–1.614) | 0.187                    | 0.547<br>(0.486–0.608) |                   |                    |

| Variable                                         | Summary statistics |                  |                        | ULR            |                        | Variables selected |         |
|--------------------------------------------------|--------------------|------------------|------------------------|----------------|------------------------|--------------------|---------|
|                                                  | Cases              | Non-cases        | OR                     | Wald Chi-      | ROC-AUC                | MLR                | MLR     |
|                                                  | (N=103)            | (N=365)          | (95% CI)               | square         | (95% CI)               | within-            | across- |
|                                                  | mean (SD); n       | mean (SD); n     |                        | <i>p</i> value |                        | bundle             | bundles |
| 6. Maximum capillary diameter                    | 93.1 (37.3); 26    | 85.9 (32.0); 119 | 0.998<br>(0.992–1.005) | 0.568          | 0.529<br>(0.470–0.587) |                    |         |
| <b>Middle fingers</b>                            |                    |                  |                        |                |                        |                    |         |
| 7. Number of capillaries/mm                      | 3.8 (1.9); 97      | 4.7 (2.2); 339   | 0.801<br>(0.707–0.907) | 0.001          | 0.614<br>(0.553–0.674) | X                  | X       |
| 8. Number of giants/mm                           | 0.5 (0.8); 97      | 0.5 (0.8); 339   | 1.018<br>(0.764–1.356) | 0.902          | 0.491<br>(0.432–0.550) |                    |         |
| 9. Number of irregularly enlarged capillaries/mm | 1.4 (1.4); 97      | 1.3 (1.4); 339   | 1.015<br>(0.868–1.188) | 0.849          | 0.510<br>(0.446–0.575) |                    |         |
| 10. Number of microhemorrhages/mm                | 0.2 (0.8); 97      | 0.3 (0.6); 339   | –†                     | 0.007          | 0.565<br>(0.524–0.605) | X                  |         |
| 11. Number of neoangiogeneses/mm                 | 0.6 (0.9); 97      | 0.4 (0.8); 339   | 1.326<br>(1.024–1.718) | 0.032          | 0.558<br>(0.498–0.617) | X                  | X       |
| 12. Maximum capillary diameter                   | 92.3 (40.3); 36    | 87.1 (30.6); 143 | 0.999<br>(0.994–1.005) | 0.807          | 0.513<br>(0.454–0.571) |                    |         |

| Variable                                          | Summary statistics      |                         | ULR                    |                          |                        | Variables selected |                    |
|---------------------------------------------------|-------------------------|-------------------------|------------------------|--------------------------|------------------------|--------------------|--------------------|
|                                                   | Cases                   | Non-cases               | OR                     | Wald Chi-                | ROC-AUC                | MLR                | MLR                |
|                                                   | (N=103)<br>mean (SD); n | (N=365)<br>mean (SD); n | (95% CI)               | square<br><i>p</i> value | (95% CI)               | within-<br>bundle  | across-<br>bundles |
| <b>Ring fingers</b>                               |                         |                         |                        |                          |                        |                    |                    |
| 13. Number of capillaries/mm                      | 4.2 (2.1); 99           | 4.6 (2.1); 343          | 0.902<br>(0.807–1.009) | 0.070                    | 0.564<br>(0.500–0.629) | X                  |                    |
| 14. Number of giants/mm                           | 0.6 (0.9); 99           | 0.7 (1.0); 343          | 0.895<br>(0.701–1.142) | 0.372                    | 0.532<br>(0.473–0.590) |                    |                    |
| 15. Number of irregularly enlarged capillaries/mm | 1.2 (1.4); 99           | 1.4 (1.5); 343          | 0.890<br>(0.754–1.050) | 0.166                    | 0.555<br>(0.491–0.619) |                    |                    |
| 16. Number of microhemorrhages/mm                 | 0.2 (0.4); 99           | 0.3 (0.6); 343          | 0.734<br>(0.451–1.195) | 0.214                    | 0.510<br>(0.462–0.557) |                    |                    |
| 17. Number of neoangiogeneses/mm                  | 0.6 (0.9); 99           | 0.5 (0.8); 343          | 1.118<br>(0.869–1.439) | 0.385                    | 0.524<br>(0.465–0.582) |                    |                    |
| 18. Maximum capillary diameter                    | 93.4 (29.4); 42         | 92.9 (38.8); 167        | 0.997<br>(0.991–1.002) | 0.186                    | 0.532<br>(0.474–0.591) |                    |                    |
| <b>Little fingers</b>                             |                         |                         |                        |                          |                        |                    |                    |
| 19. Number of capillaries/mm                      | 4.1 (1.8); 97           | 5.0 (2.1); 347          | 0.808<br>(0.715–0.913) | 0.001                    | 0.620<br>(0.558–0.681) | X                  |                    |

| Variable                                                                               | Summary statistics      |                         | ULR                    |                          |                        | Variables selected |                    |
|----------------------------------------------------------------------------------------|-------------------------|-------------------------|------------------------|--------------------------|------------------------|--------------------|--------------------|
|                                                                                        | Cases                   | Non-cases               | OR                     | Wald Chi-                | ROC-AUC                | MLR                | MLR                |
|                                                                                        | (N=103)<br>mean (SD); n | (N=365)<br>mean (SD); n | (95% CI)               | square<br><i>p</i> value | (95% CI)               | within-<br>bundle  | across-<br>bundles |
| 20. Number of giants/mm                                                                | 0.6 (1.0); 97           | 0.5 (0.8); 347          | 1.155<br>(0.907–1.469) | 0.242                    | 0.513<br>(0.453–0.573) |                    |                    |
| 21. Number of irregularly enlarged capillaries/mm                                      | 1.2 (1.3); 97           | 1.3 (1.4); 347          | 0.974<br>(0.822–1.153) | 0.756                    | 0.502<br>(0.439–0.565) |                    |                    |
| 22. Number of microhemorrhages/mm                                                      | 0.2 (0.5); 97           | 0.3 (0.6); 347          | 0.791<br>(0.504–1.242) | 0.308                    | 0.525<br>(0.476–0.574) |                    |                    |
| 23. Number of neoangiogeneses/mm                                                       | 0.6 (0.8); 97           | 0.6 (0.9); 347          | 1.034<br>(0.807–1.326) | 0.790                    | 0.519<br>(0.460–0.578) |                    |                    |
| 24. Maximum capillary diameter                                                         | 89.1 (28.7); 37         | 86.1 (33.5); 147        | 1.001<br>(0.996–1.007) | 0.692                    | 0.497<br>(0.436–0.558) |                    |                    |
| <b>Finger level (V = 24): non-dominant hand, 4 individual fingers (Sub-bundle 5.6)</b> |                         |                         |                        |                          |                        |                    |                    |
| <b>Index fingers</b>                                                                   |                         |                         |                        |                          |                        |                    |                    |
| 1. Number of capillaries/mm                                                            | 4.4 (2.0); 92           | 4.9 (2.4); 343          | 0.902<br>(0.811–1.003) | 0.056                    | 0.562<br>(0.499–0.624) | X                  |                    |
| 2. Number of giants/mm                                                                 | 0.5 (0.9); 92           | 0.4 (0.8); 343          | 1.103<br>(0.839–1.449) | 0.484                    | 0.497<br>(0.439–0.555) |                    |                    |



| Variable                                         | Summary statistics      |                         | ULR                    |                          |                        | Variables selected |                    |
|--------------------------------------------------|-------------------------|-------------------------|------------------------|--------------------------|------------------------|--------------------|--------------------|
|                                                  | Cases                   | Non-cases               | OR                     | Wald Chi-                | ROC-AUC                | MLR                | MLR                |
|                                                  | (N=103)<br>mean (SD); n | (N=365)<br>mean (SD); n | (95% CI)               | square<br><i>p</i> value | (95% CI)               | within-<br>bundle  | across-<br>bundles |
| 3. Number of irregularly enlarged capillaries/mm | 1.2 (1.3); 92           | 1.3 (1.5); 343          | 0.959<br>(0.815–1.129) | 0.619                    | 0.503<br>(0.440–0.567) |                    |                    |
| 4. Number of microhemorrhages/mm*                | 0.1 (0.3); 92           | 0.2 (0.5); 343          | 0.460<br>(0.225–0.941) | 0.033                    | 0.550<br>(0.507–0.593) | X                  |                    |
| 5. Number of neoangiogeneses/mm*                 | 0.7 (0.9); 92           | 0.5 (0.8); 343          | 1.472<br>(1.137–1.904) | 0.003                    | 0.579<br>(0.516–0.643) | X                  |                    |
| 6. Maximum capillary diameter                    | 86.2 (35.8); 30         | 88.6 (34.9); 128        | 0.997<br>(0.991–1.003) | 0.341                    | 0.526<br>(0.470–0.523) |                    |                    |
| <b>Middle fingers</b>                            |                         |                         |                        |                          |                        |                    |                    |
| 7. Number of capillaries/mm                      | 4.1 (2.0); 97           | 4.8 (2.3); 341          | 0.864<br>(0.773–0.965) | 0.010                    | 0.582<br>(0.518–0.646) | X                  |                    |
| 8. Number of giants/mm                           | 0.7 (1.0); 97           | 0.6 (0.9); 341          | 1.129<br>(0.892–1.428) | 0.312                    | 0.537<br>(0.478–0.597) |                    |                    |
| 9. Number of irregularly enlarged capillaries/mm | 1.2 (1.4); 97           | 1.4 (1.4); 341          | 0.942<br>(0.798–1.112) | 0.480                    | 0.528<br>(0.464–0.592) |                    |                    |

| Variable                                          | Summary statistics      |                         | ULR                    |                          | Variables selected     |                   |                    |
|---------------------------------------------------|-------------------------|-------------------------|------------------------|--------------------------|------------------------|-------------------|--------------------|
|                                                   | Cases                   | Non-cases               | OR                     | Wald Chi-                | ROC-AUC                | MLR               | MLR                |
|                                                   | (N=103)<br>mean (SD); n | (N=365)<br>mean (SD); n | (95% CI)               | square<br><i>p</i> value | (95% CI)               | within-<br>bundle | across-<br>bundles |
| 10. Number of microhemorrhages/mm                 | 0.2 (0.4); 97           | 0.2 (0.5); 341          | 0.829<br>(0.517–1.328) | 0.435                    | 0.509<br>(0.461–0.557) |                   |                    |
| 11. Number of neoangiogeneses/mm                  | 0.5 (0.8); 97           | 0.5 (0.8); 341          | 1.088<br>(0.820–1.443) | 0.558                    | 0.523<br>(0.464–0.581) |                   |                    |
| 12. Maximum capillary diameter                    | 88.3 (39.9); 49         | 89.3 (34.6); 152        | 1.002<br>(0.997–1.007) | 0.532                    | 0.524<br>(0.464–0.584) |                   |                    |
| <b>Ring fingers</b>                               |                         |                         |                        |                          |                        |                   |                    |
| 13. Number of capillaries/mm*                     | 4.2 (2.0); 94           | 4.9 (2.2); 352          | 0.831<br>(0.739–0.934) | 0.002                    | 0.607<br>(0.545–0.670) | X                 |                    |
| 14. Number of giants/mm                           | 0.6 (1.0); 94           | 0.7 (1.0); 352          | 0.951<br>(0.747–1.212) | 0.687                    | 0.526<br>(0.466–0.587) |                   |                    |
| 15. Number of irregularly enlarged capillaries/mm | 1.4 (1.5); 94           | 1.3 (1.4); 352          | 1.049<br>(0.899–1.223) | 0.545                    | 0.517<br>(0.450–0.584) |                   |                    |
| 16. Number of microhemorrhages/mm                 | 0.2 (0.5); 94           | 0.3 (0.6); 352          | 0.816<br>(0.524–1.270) | 0.368                    | 0.533<br>(0.484–0.581) |                   |                    |
| 17. Number of neoangiogeneses/mm                  | 0.8 (1.1); 94           | 0.6 (0.9); 352          | 1.276<br>(1.017–1.601) | 0.035                    | 0.548<br>(0.484–0.612) | X                 |                    |

| Variable                                          | Summary statistics      |                         | ULR                    |                          |                        | Variables selected |                    |
|---------------------------------------------------|-------------------------|-------------------------|------------------------|--------------------------|------------------------|--------------------|--------------------|
|                                                   | Cases                   | Non-cases               | OR                     | Wald Chi-                | ROC-AUC                | MLR                | MLR                |
|                                                   | (N=103)<br>mean (SD); n | (N=365)<br>mean (SD); n | (95% CI)               | square<br><i>p</i> value | (95% CI)               | within-<br>bundle  | across-<br>bundles |
| 18. Maximum capillary diameter                    | 93.0 (38.3); 42         | 96.3 (41.6); 172        | 0.998<br>(0.993–1.003) | 0.354                    | 0.529<br>(0.469–0.590) |                    |                    |
| <b>Little fingers</b>                             |                         |                         |                        |                          |                        |                    |                    |
| 19. Number of capillaries/mm                      | 4.3 (2.1); 100          | 4.9 (2.2); 348          | 0.871<br>(0.783–0.971) | 0.012                    | 0.592<br>(0.528–0.656) | X                  |                    |
| 20. Number of giants/mm                           | 0.4 (0.7); 100          | 0.4 (0.8); 348          | 0.954<br>(0.710–1.282) | 0.755                    | 0.497<br>(0.444–0.550) |                    |                    |
| 21. Number of irregularly enlarged capillaries/mm | 1.3 (1.5); 100          | 1.2 (1.3) 348           | 1.074<br>(0.913–1.263) | 0.386                    | 0.506<br>(0.440–0.571) |                    |                    |
| 22. Number of microhemorrhages/mm                 | 0.2 (0.5); 100          | 0.2 (0.5); 348          | 0.928<br>(0.596–1.443) | 0.739                    | 0.505<br>(0.459–0.551) |                    |                    |
| 23. Number of neoangiogeneses/mm                  | 0.8 (0.9); 100          | 0.6 (0.9); 348          | 1.216<br>(0.969–1.525) | 0.091                    | 0.560<br>(0.499–0.621) | X                  |                    |
| 24. Maximum capillary diameter                    | 88.0 (37.6); 35         | 88.1 (39.1) 119         | 0.999<br>(0.993–1.004) | 0.631                    | 0.504<br>(0.449–0.558) |                    |                    |

Reduction of covariables through Step 1: ULR (Retention criterion:  $p < 0.15$  for linear term or  $p < 0.05$  for quadratic term), Step 2: MLR within-bundle (Entry criterion:  $p < 0.15$ ; Retention criterion:  $p < 0.10$ ), and Step 3: MLR across-bundles (Entry criterion:  $p < 0.15$ ; Retention criterion:  $p < 0.05$ ).

\*For the NVC bundle, several types of assessments, sub-bundles met the statistical criteria mentioned above to be retained after Step 2. However, in order to retain only one type of NVC assessment in the final model (for practicability), the Steering Committee decided on only retaining the sub-bundle with the highest AUC (i.e. sub-bundle 5.5). The other NVC covariables were subsequently not retained (\*)

\*OR is not given since the functional relationship is quadratic. Associated  $p$  value and ROC-AUC are of quadratic term

Abbreviations: AUC, area under the curve; CI, confidence interval; MLR, multivariable logistic regression; NVC, nailfold videocapillaroscopy; OR, odds ratio; ROC, receiver operating characteristic; SD, standard deviation; ULR, univariable logistic regression

**Supplementary Table S6. Nailfold videocapillaroscopic characteristics: qualitative assessment (1 covariable)**

| Variable                           | Summary statistics |                |                                      | ULR                |                        | Variables selected |          |
|------------------------------------|--------------------|----------------|--------------------------------------|--------------------|------------------------|--------------------|----------|
|                                    | Cases              | Non-cases      | OR                                   | Wald Chi-          | ROC-AUC                | MLR                | MLR      |
|                                    | (N=103)            | (N=365)        | (95% CI)                             | square             | (95% CI)               | within-            | across-  |
|                                    | n/N (%)            | n/N (%)        |                                      | <i>p</i> value     |                        | bundle             | bundles  |
| <b>Number of variables (V = 1)</b> |                    |                |                                      |                    |                        | <b>1</b>           | <b>0</b> |
| NVC qualitative assessment         |                    |                |                                      |                    |                        |                    |          |
| 1. NVC pattern*                    |                    |                |                                      |                    |                        |                    |          |
| Normal/early                       | 4/103 (3.9)        | 44/363 (12.1)  |                                      |                    |                        |                    |          |
| Active                             | 25/103 (24.3)      | 123/363 (33.9) | 2.234 <sup>†</sup><br>(0.736–6.779)  | 0.156 <sup>†</sup> | 0.597<br>(0.548–0.647) | X                  |          |
| Late                               | 74/103 (71.8)      | 196/363 (54.0) | 4.150 <sup>‡</sup><br>(1.441–11.950) | 0.008 <sup>‡</sup> |                        |                    |          |

Reduction of covariables through Step 1: ULR (Retention criterion:  $p < 0.15$  for linear term or  $p < 0.05$  for quadratic term), Step 2: MLR within-bundle (Entry criterion:  $p < 0.15$ ; Retention criterion:  $p < 0.10$ ), and Step 3: MLR across-bundles (Entry criterion:  $p < 0.15$ ; Retention criterion:  $p < 0.05$ ).

\*For the NVC bundle, several types of assessments, sub-bundles met the statistical criteria mentioned above to be retained after Step 2. However, in order to retain only one type of NVC assessment in the final model (for practicability), the Steering Committee decided on only retaining the sub-bundle with the highest AUC (i.e., sub-bundle 5.5). The other NVC covariables were subsequently not retained (\*).

<sup>†</sup>Active vs Normal/early

<sup>‡</sup>Late vs Normal/early

Abbreviations: AUC, area under the curve; CI, confidence interval; MLR, multivariable logistic regression; NVC, nailfold videocapillaroscopy; OR, odds ratio; ROC, receiver operating characteristic; SD, standard deviation; ULR, univariable logistic regression

#### 4. Definitions of DUs, critical digital ischemia, and other digital lesions

**Supplementary Table S7. Definitions of digital ulcer (DU), critical digital ischemia, and other (than DU) digital lesions**

| <b>Digital lesion</b>     | <b>Definition used</b>                                                                                                                                                                                                                                                             |
|---------------------------|------------------------------------------------------------------------------------------------------------------------------------------------------------------------------------------------------------------------------------------------------------------------------------|
| Digital ulcer             | A DU was defined as a denuded area located on the fingers of the hands and with defined border and loss of epithelization, loss of epidermis and dermis. It did not include fissures, paronychia, pitting scars, or ulcers located over the metacarpo-phalangeal joints or elbows. |
| Digital critical ischemia | This is not Raynaud's phenomenon.<br>It is a prolonged, severe, persistent reduction in digital tissue perfusion without re-warming.                                                                                                                                               |
| Fissures                  | Linear cleavage of skin that extends into the dermis.                                                                                                                                                                                                                              |
| Paronychia                | Skin infection that occurs around the nails.                                                                                                                                                                                                                                       |
| Pitting scars             | Small-sized hyperkeratosis.                                                                                                                                                                                                                                                        |
| Calcinosis                | Deposits of calcium-containing salts in soft tissues, visible to the naked eye and/or confirmed by X-ray.                                                                                                                                                                          |

---

## 5. Chart for DU location

Supplementary Figure S1. Coding of the location of digital ulcers

| R or L                         | 1, 2, 3, 4 or 5                                                                                             | 1, 2, 3, a or b                                                                                                                                                  | D, P or L                                        |
|--------------------------------|-------------------------------------------------------------------------------------------------------------|------------------------------------------------------------------------------------------------------------------------------------------------------------------|--------------------------------------------------|
| Hand:<br>R = right<br>L = left | Digit number:<br>1 = thumb<br>2 = index finger<br>3 = middle finger<br>4 = ring finger<br>5 = little finger | Phalange:<br>1 = proximal phalange<br>2 = intermediate phalange<br>3 = distal phalange<br>a = proximal interphalangeal joint<br>b = distal interphalangeal joint | Side:<br>D = dorsal<br>P = palmar<br>L = lateral |

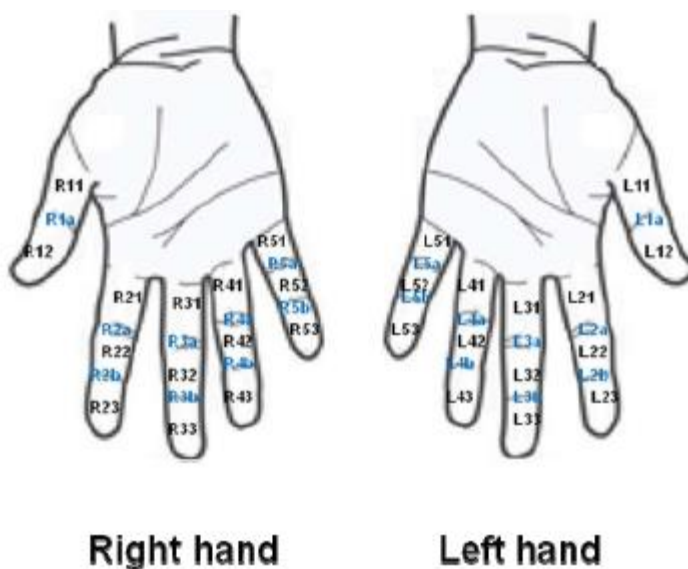

Table and sketch illustrating how the location of DU is coded.

## **6. Investigator booklet**

Images on page 1, 4–7 and 9–13 by Dr R. De Angelis, Dr Del Medico, Dr Riccieri and Dr Sulli from M. Cutolo “Atlas of capillaroscopy in rheumatic diseases” Elsevier Srl Milano 2010

# CAP

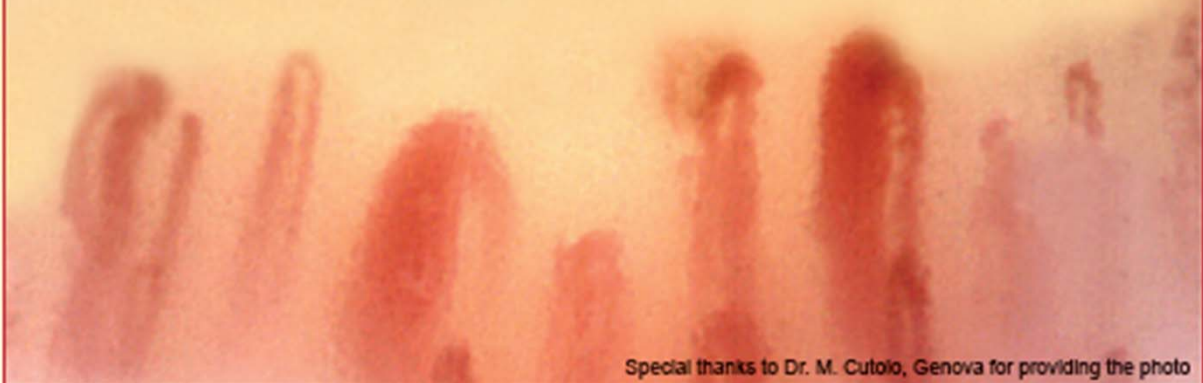

Special thanks to Dr. M. Cutoio, Genova for providing the photo

## Investigator booklet

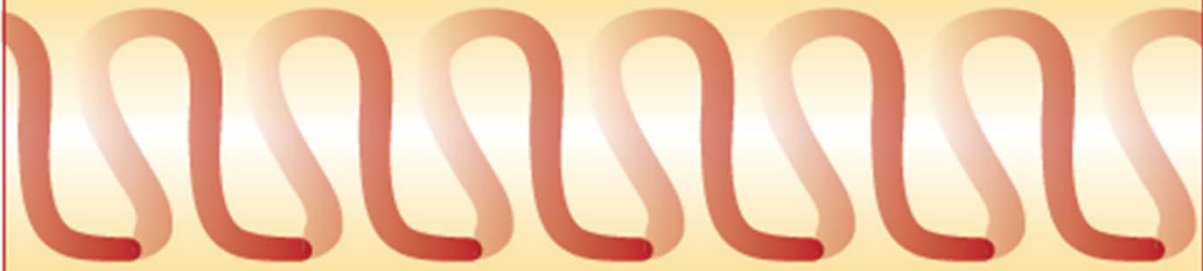



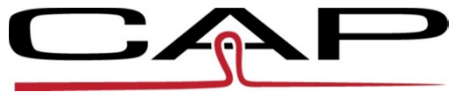

## Table of contents

|                                                |           |
|------------------------------------------------|-----------|
| • <b>General guidelines</b>                    | <b>3</b>  |
| • <b>Normal (healthy) morphology</b>           | <b>4</b>  |
| Hairpin shape, afferent, efferent, apical limb | 4         |
| Tortuosity                                     | 4         |
| Crossing                                       | 4         |
| • <b>Abnormal morphology</b>                   | <b>5</b>  |
| Irregularly enlarged capillary                 | 5         |
| Giant capillary                                | 5         |
| Microhemorrhage                                | 6         |
| Meandering capillary                           | 7         |
| Ramified, branching, bushy capillary           | 7         |
| Bizarre capillary                              | 7         |
| • <b>NVC variables assessed in CAP</b>         | <b>8</b>  |
| SSc pattern: early, active, late               | 8         |
| Number of capillaries; distal row              | 10        |
| Number of irregularly enlarged capillaries     | 11        |
| Number of giant capillaries                    | 11        |
| Number of microhemorrhages                     | 12        |
| Number of neoangiogeneses                      | 13        |
| Maximum capillary diameter                     | 14        |
| • <b>Frequently asked questions</b>            | <b>15</b> |

## General guidelines

Prior to examination the patient must have been for 15 minutes in a room at 22-23°C prior to NVC assessment. He/she must refrain from smoking and drinking caffeinated drinks for 4 hours prior to NVC assessment.

Do not analyze fingers which underwent recent trauma since this could entail microvascular abnormalities.

NVC assessment can be hampered by recent manicure, chemical substances, radiations, vibrating tools, gardening, and intensive guitar playing. In such cases, the NVC assessment must be rescheduled.

For the evaluation of the NVC parameters, a 200x lens is used.

Two adjacent non overlapping fields located in the center of the nailbed for each of fingers 2 to 5 of each hand are evaluated (16 fields in total). Working on adjacent fields is essential to avoid bias in the image selection.

We recommend that you always take capillaroscopic images from left to right (like when you read): starting with the patient's right hand, 5<sup>th</sup> (little) finger, moving on to the right hand, 4<sup>th</sup> (ring) finger, ending with the left hand, 5<sup>th</sup> (little) finger as shown below.

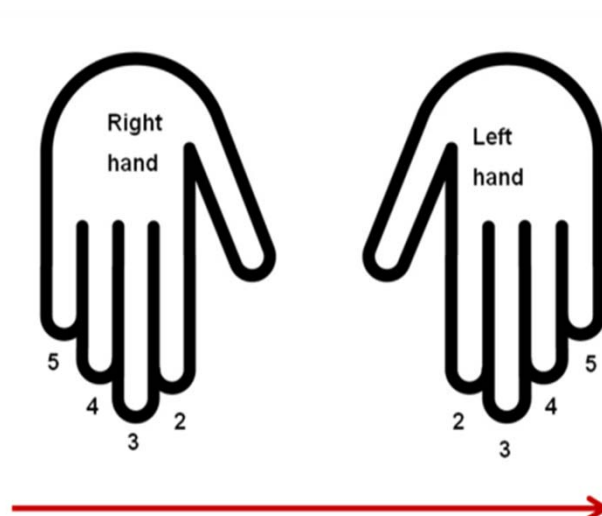

## Normal (healthy) morphology

In a healthy person, hairpin-shaped capillaries can be observed. The average density is 9-12 capillaries per mm.

Normal capillaries can also have tortuosities and crossings.

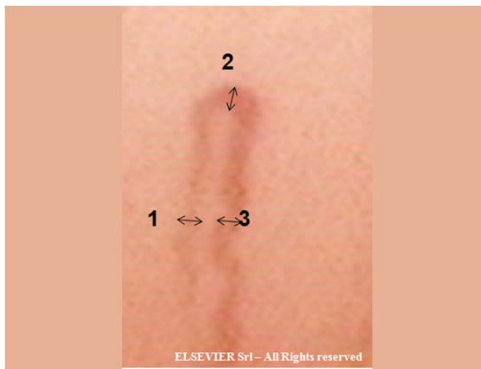

Normal **hairpin-shaped** capillary

1 – **afferent** (arterial) limb

2 – **apical** (transitional) limb

3 – **efferent** (venous) limb (diameter  $<20\mu\text{m}$ )

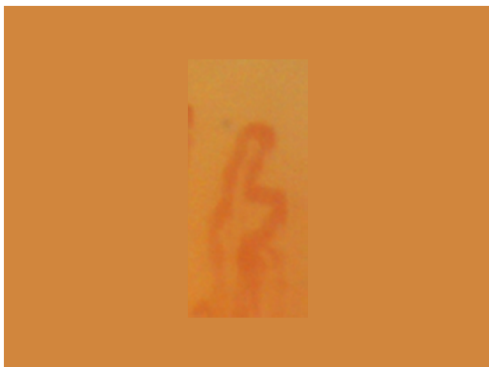

**Tortuosity:** Bending of afferent and efferent limb but not apical limb.

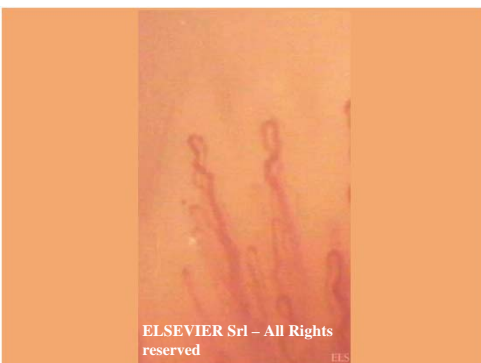

**Crossing capillary:** Capillary whose limbs cross once or twice.

## Abnormal morphology

Abnormal capillaries are not pathologic if they occur isolated.

In SSc patients, irregularly enlarged capillaries, giant capillaries, microhemorrhages and neoangiogeneses (meandering, ramified, branching, bushy and bizarre capillaries) may be observed.

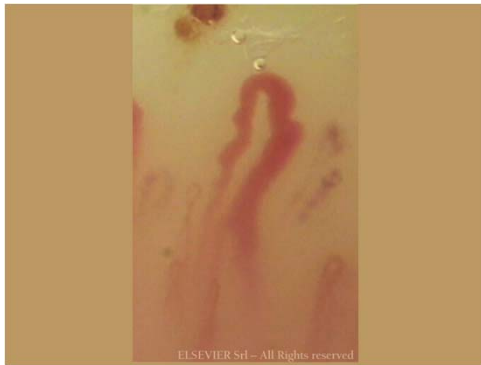

**Irregularly enlarged capillary:** Capillary with a diameter  $>20\mu\text{m}$ . Morphology can be hairpin-shaped, tortuous or crossing once.

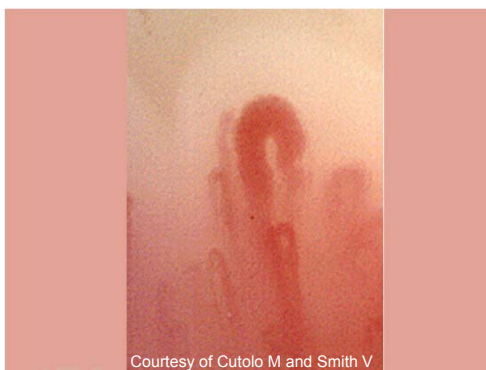

**Giant capillary:** Hairpin-shaped or horseshoe-shaped homogeneously large capillary with diameter  $>50\mu\text{m}$ . (Horseshoe shape: diameter of apical limb is larger than that of afferent and efferent limb.)

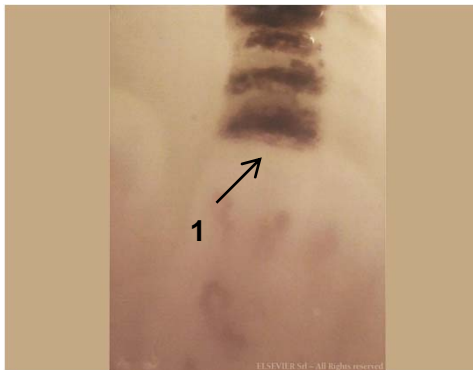

**Microhemorrhage (1):** Dark mass due to hemosiderin deposit which can be linked to a disappearing capillary. One microhemorrhage refers to one capillary that bled. Large confluent bleedings that cannot be linked to a disappearing capillary are not counted.

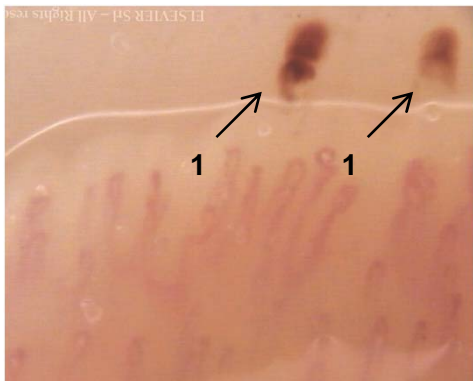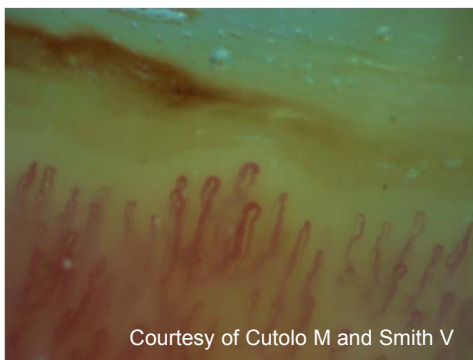

Large, confluent bleeding (not counted in CAP)

# CAP

Meandering, ramified, branching, bushy, and bizarre capillaries are the result of **neoangiogenesis**.

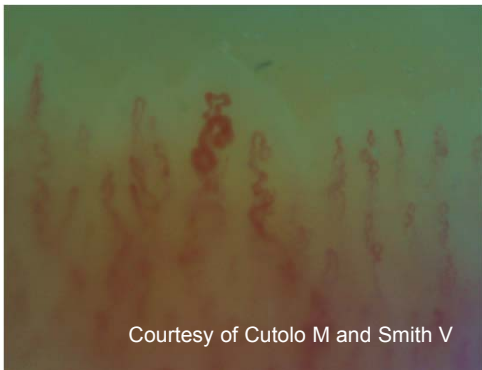

**Meandering:** Capillary in which all three limbs (afferent, apical and efferent) cross upon themselves or with each other several times.

Meandering should not be confused with tortuosities, in which only afferent and efferent limbs are bended.

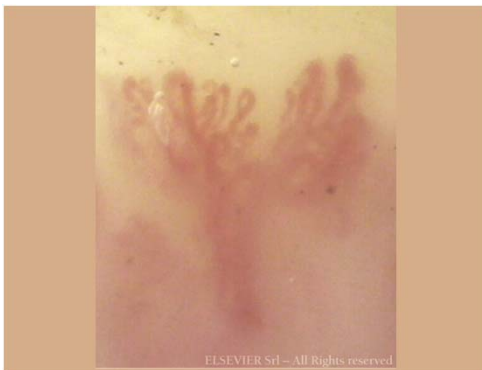

**Ramified, branching, bushy capillary**

**Bizarre capillary** (no picture): Abnormal capillary not matching any of the definitions provided above.

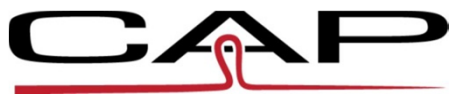

## NVC variables assessed in CAP

This guide explains how to fill in the section “Nailfold Videocapillaroscopy“ of the eCRF.

"" indicates an assessment as listed in the eCRF.

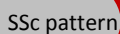 SSc pattern according to NVC (if several patterns coexist, please select most severe manifestation pattern).

### **SSc pattern**

Among the 16 fields (8 fingers, 2 fields per finger), please choose the most severe manifestation pattern: early, active, or late. For example, if a patient has some fields with an active pattern and others with a late pattern, please select the late pattern.

In case of doubt and in borderline cases, the following rules may be applied:

**Early SSc pattern:** Presence of giant capillaries and microhemorrhages. The worst field has at least 6 capillaries.

**Active SSc pattern:** There are always giant capillaries and sometimes ramifications. The worst field has 4-6 capillaries.

**Late SSc pattern:** The worst field has 3 capillaries or less, or more than two-thirds neoangiogeneses.

**Normal** may be selected if no abnormal morphology is observed.

Illustrations on next page

SSc pattern according to NVC (if several patterns coexist, please select most severe manifestation pattern).

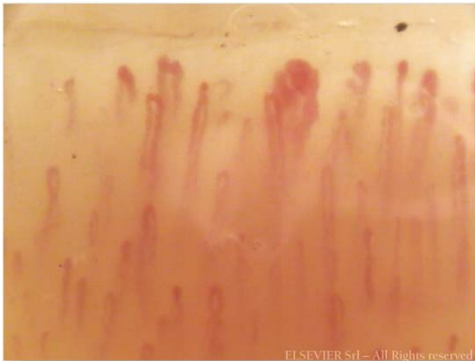

**Early SSc pattern:** Few giant capillaries, few capillary microhemorrhages, relatively well-preserved capillary distribution, no evident loss of capillaries.

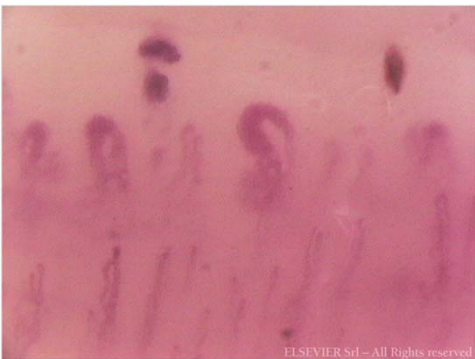

**Active SSc pattern:** Frequent giant capillaries, frequent capillary microhemorrhages, moderate loss of capillaries, mild disorganization of the capillary architecture, absent or mild ramified capillaries. Usually this pattern is associated with 4-6 capillaries / mm.

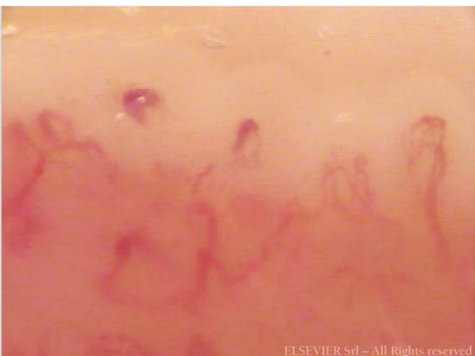

**Late SSc pattern:** Irregular enlargement of the capillaries, few or absent giant capillaries and microhemorrhages, severe loss of capillaries with avascular areas, disorganization of the normal capillary array, and ramified/bushy capillaries. Usually this pattern is associated with < 4 capillaries / mm.



|               |                                    |                     |                    |                   |                             |
|---------------|------------------------------------|---------------------|--------------------|-------------------|-----------------------------|
| # Capillaries | # Irregularly enlarged capillaries | # Giant capillaries | # Microhemorrhages | # neoangiogeneses | Max capillary diameter (µm) |
|---------------|------------------------------------|---------------------|--------------------|-------------------|-----------------------------|

## Number of capillaries

Please count the number of normal and abnormal capillaries which refers to the number of capillaries counted along one linear millimeter within the distal row of the nailfold.

**Distal row:** The distal row is the row of capillaries closest to the nail side corresponding to the entire front line. All capillaries which are longer than half of the average capillary length are counted.

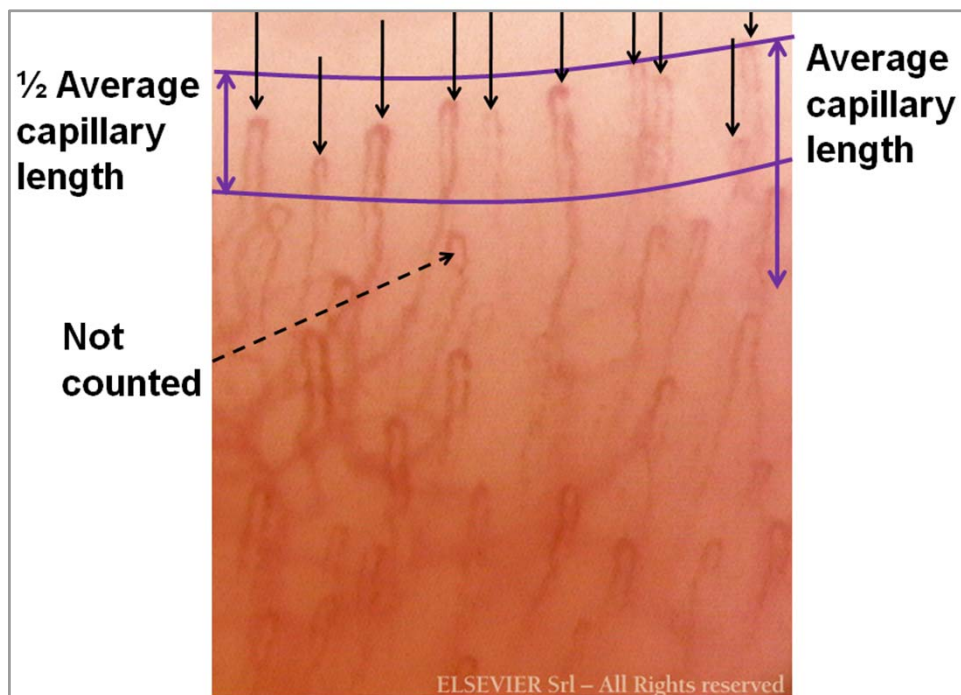

|               |                                    |                     |                    |                   |                                          |
|---------------|------------------------------------|---------------------|--------------------|-------------------|------------------------------------------|
| # Capillaries | # Irregularly enlarged capillaries | # Giant capillaries | # Microhemorrhages | # Neoangiogeneses | Max capillary diameter ( $\mu\text{m}$ ) |
|---------------|------------------------------------|---------------------|--------------------|-------------------|------------------------------------------|

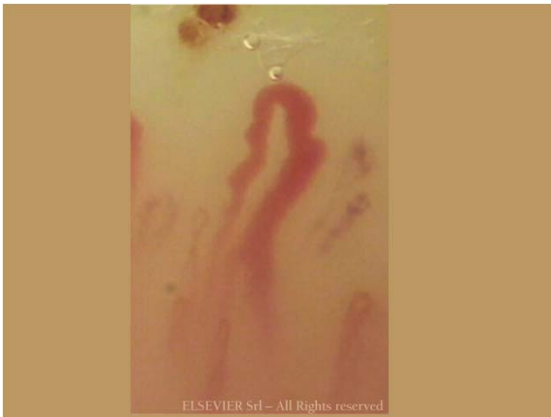

### Number of irregularly enlarged capillaries

Please count all capillaries within the distal row and with a diameter  $>20 \mu\text{m}$  in a linear millimeter. Morphology can be normal, tortuous or crossing once.

|               |                                    |                     |                    |                   |                                          |
|---------------|------------------------------------|---------------------|--------------------|-------------------|------------------------------------------|
| # Capillaries | # Irregularly enlarged capillaries | # Giant capillaries | # Microhemorrhages | # neoangiogeneses | Max capillary diameter ( $\mu\text{m}$ ) |
|---------------|------------------------------------|---------------------|--------------------|-------------------|------------------------------------------|

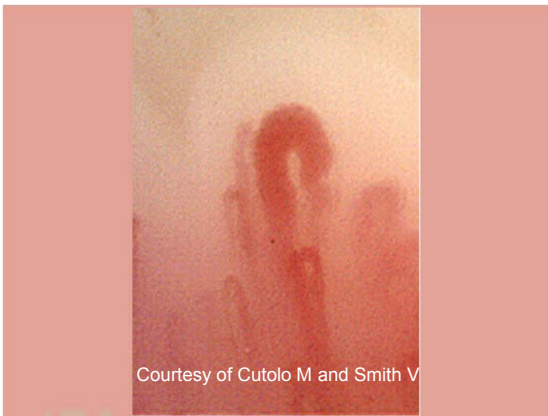

### Number of giant capillaries

Please count all hairpin-shaped or horseshoe-shaped homogeneously large capillaries within the distal row and with a diameter  $>50\mu\text{m}$  in a linear millimeter. (Horseshoe shape: diameter of apical limb is larger than that of afferent and efferent limb.)

|               |                                    |                     |                    |                   |                                          |
|---------------|------------------------------------|---------------------|--------------------|-------------------|------------------------------------------|
| # Capillaries | # Irregularly enlarged capillaries | # Giant capillaries | # Microhemorrhages | # neoangiogeneses | Max capillary diameter ( $\mu\text{m}$ ) |
|---------------|------------------------------------|---------------------|--------------------|-------------------|------------------------------------------|

## Number of microhemorrhages

Please count all dark masses due to hemosiderin deposit and which can be linked to a disappearing capillary in a linear millimeter. One microhemorrhage refers to one capillary that bled. Large confluent bleedings that cannot be linked to a disappearing capillary are not counted.

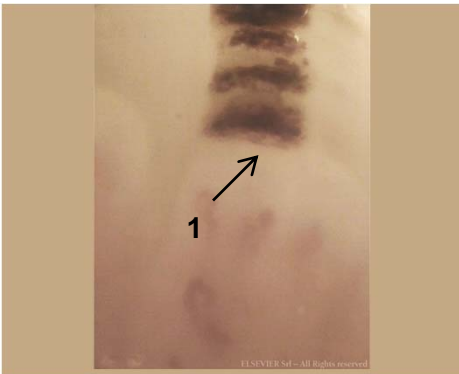

One microhemorrhage.

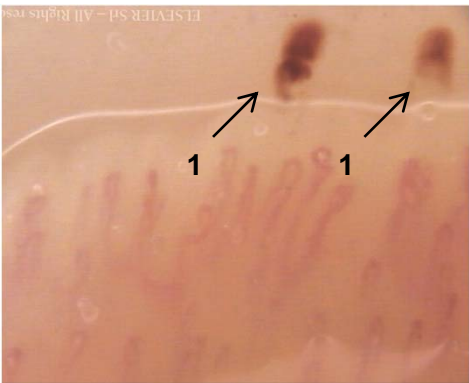

Two microhemorrhages.

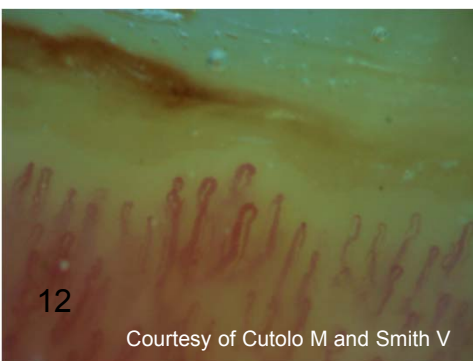

Large, confluent bleeding (not counted in CAP)

## Number of neoangiogeneses

Please count all meandering, ramified, branching, bushy, bizarre capillaries, and capillaries with more than two crossings. Count within the distal row in one linear millimeter.

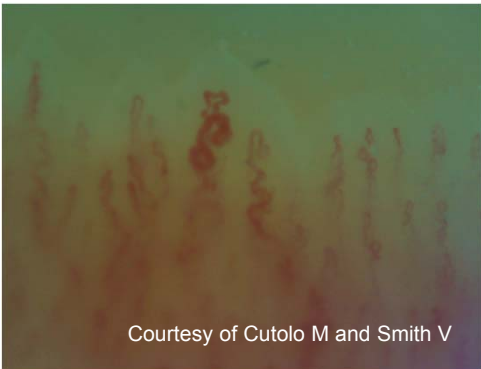

=

**Meandering:** Capillary in which all three limbs (afferent, apical and efferent) cross upon themselves or with each other several times.

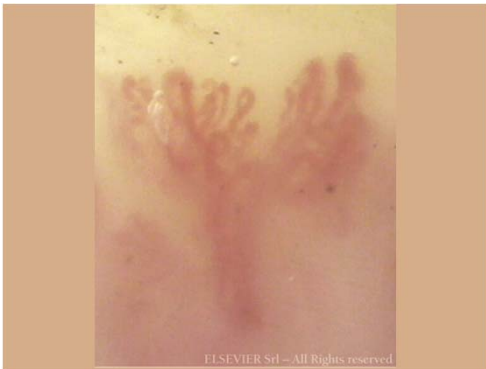

+

**Ramified, branching, bushy capillary**

+

**Capillaries with more than two crossings** (no picture).

+

**Bizarre capillary** (no picture): Abnormal capillary not matching any of the definitions provided above.

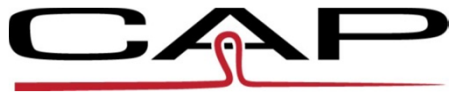

# Capillaries # Irregularly enlarged capillaries # Giant capillaries # Microhemorrhages # neoangiogenesis **Max capillary diameter ( $\mu\text{m}$ )**

 **Maximum capillary diameter**

Please choose among all homogeneously large (diameter  $\geq 50\mu\text{m}$ ) capillaries in the 1-mm field, (if any) maximum diameter, irrespective of morphology.

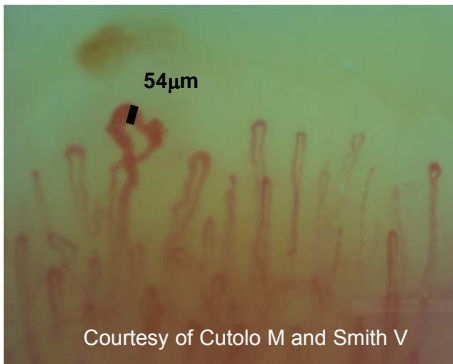

## Frequently asked questions

### What does a normal NVC pattern look like?

It has thin, parallel capillaries. 9-12 capillaries / mm in the distal row.

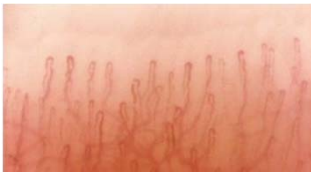

### Why do I see bubbles on the image?

It is probable that the operator used too much immersion oil. Reducing the amount of oil could improve the image quality.

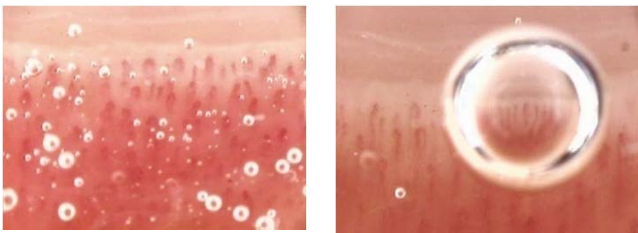

### Why are there reflections on the image?

It is probable that the operator used too little immersion oil. Increasing the amount of oil could improve the image quality.

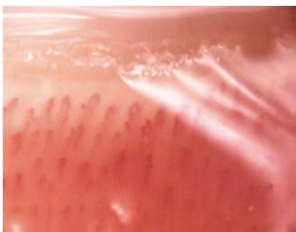

### Why can't I clearly see capillaries?

It is probable that the operator pressed too hard on the nailfold, therefore preventing blood cells from flowing in the capillaries. Releasing the pressure could improve the image visibility.

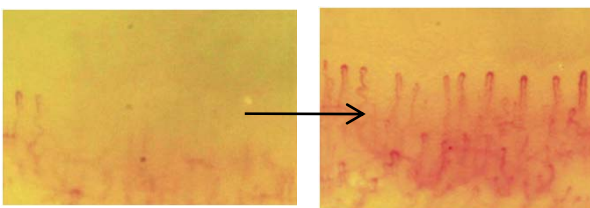

## 7. Interactions – bundle 6

### Supplementary Table S8. Interactions investigated and grouped into a separate bundle on Steering Committee advice

#### Interactions grouped into a separate bundle on Steering Committee advice

Sex and age at enrollment

Sex and age at first physician-documented non-Raynaud's clinical feature

Age at enrollment and years since first physician-documented non-Raynaud's clinical feature

Age at enrollment and years since first Raynaud's phenomenon

Age at enrollment and age at first physician-documented non-Raynaud's clinical feature

Age at enrollment and age at first Raynaud's clinical phenomenon

SSc subtype and age at first physician-documented non-Raynaud's clinical feature

SSc subtype and mRSS

---

Following the advice from the Steering Committee, pre-specified interactions were investigated in Step 2, within a separate bundle, using a stepwise forward selection procedure with specific selection criteria (Entry criterion:  $p < 0.15$ ; Retention criterion:  $p < 0.10$ ). For all pairs of covariables the  $p$  value was  $> 0.10$ , so none of them were retained.

Abbreviations: mRSS, Modified Rodnan Skin Score; SSc, systemic sclerosis

## 8. Excluded variables

### Supplementary Table S9. Overview of variables excluded because they consisted of fewer than 20 patients

#### Binary variables with a frequency of fewer than 20 patients

|                                                         |                                                                                                                                                                                                                                                                                                                                                                                                                           |
|---------------------------------------------------------|---------------------------------------------------------------------------------------------------------------------------------------------------------------------------------------------------------------------------------------------------------------------------------------------------------------------------------------------------------------------------------------------------------------------------|
| Bundle 1: Demographics                                  | None                                                                                                                                                                                                                                                                                                                                                                                                                      |
| Bundle 2: SSc clinical characteristics                  | Organ involvement: <ul style="list-style-type: none"><li>- Nervous system</li></ul> (Connective) Tissue disease: <ul style="list-style-type: none"><li>- Systemic Lupus Erythematosus</li><li>- Dermatomyositis</li><li>- Polymyositis</li><li>- Marfan syndrome</li><li>- Ehlers-Danlos syndrome</li><li>- Osteogenesis imperfecta</li><li>- Stickler syndrome</li><li>- Any other (connective) tissue disease</li></ul> |
| Bundle 3: Digital ulcer characteristics                 | None                                                                                                                                                                                                                                                                                                                                                                                                                      |
| Bundle 4: Other clinical characteristics                | None                                                                                                                                                                                                                                                                                                                                                                                                                      |
| Bundle 5: Nailfold videocapillaroscopic characteristics | None                                                                                                                                                                                                                                                                                                                                                                                                                      |

---

Abbreviations: SSc, systemic sclerosis



## Supplementary Table S10. Overview of variables excluded on clinical advice from the Steering Committee

### Variables excluded on clinical advice from the Steering Committee

|                                                         |                                                                                                                                                                                                                                                                                                                                                                                                                                                                                                                                                                                                                                                                                                       |
|---------------------------------------------------------|-------------------------------------------------------------------------------------------------------------------------------------------------------------------------------------------------------------------------------------------------------------------------------------------------------------------------------------------------------------------------------------------------------------------------------------------------------------------------------------------------------------------------------------------------------------------------------------------------------------------------------------------------------------------------------------------------------|
| Bundle 1: Demographics                                  | <ul style="list-style-type: none"><li>- Height (cm)</li><li>- Conduct manual labor</li></ul>                                                                                                                                                                                                                                                                                                                                                                                                                                                                                                                                                                                                          |
| Bundle 2: SSc clinical characteristics                  | None                                                                                                                                                                                                                                                                                                                                                                                                                                                                                                                                                                                                                                                                                                  |
| Bundle 3: DU characteristics                            | <ul style="list-style-type: none"><li>- Presence of DU</li><li>- At least one DU in fingertips</li><li>- At least one DU in finger joints</li><li>- Previous or current (= at enrollment) complications:<ul style="list-style-type: none"><li>• Soft tissue infection requiring antibiotics</li><li>• Auto-amputation</li><li>• Critical digital ischemia</li><li>• Gangrene</li><li>• Any previous or current complication</li></ul></li><li>- Current DU-associated interventions:<ul style="list-style-type: none"><li>• Current wound debridement</li><li>• Current antiseptics</li><li>• Current wound supportive gels/creams</li></ul></li><li>- Any previous or current intervention</li></ul> |
| Bundle 4: Other clinical characteristics                | <ul style="list-style-type: none"><li>- Allen test: number of abnormal hands</li><li>- Number of pitting scars</li></ul>                                                                                                                                                                                                                                                                                                                                                                                                                                                                                                                                                                              |
| Bundle 5: Nailfold videocapillaroscopic characteristics | <ul style="list-style-type: none"><li>• None</li></ul>                                                                                                                                                                                                                                                                                                                                                                                                                                                                                                                                                                                                                                                |

---

Abbreviations: DU, digital ulcer; SSc, systemic sclerosis

## 9. New digital ulcer occurrence by Center

Figure S2. Frequency of Patients, Cases, and Non-Cases per Center

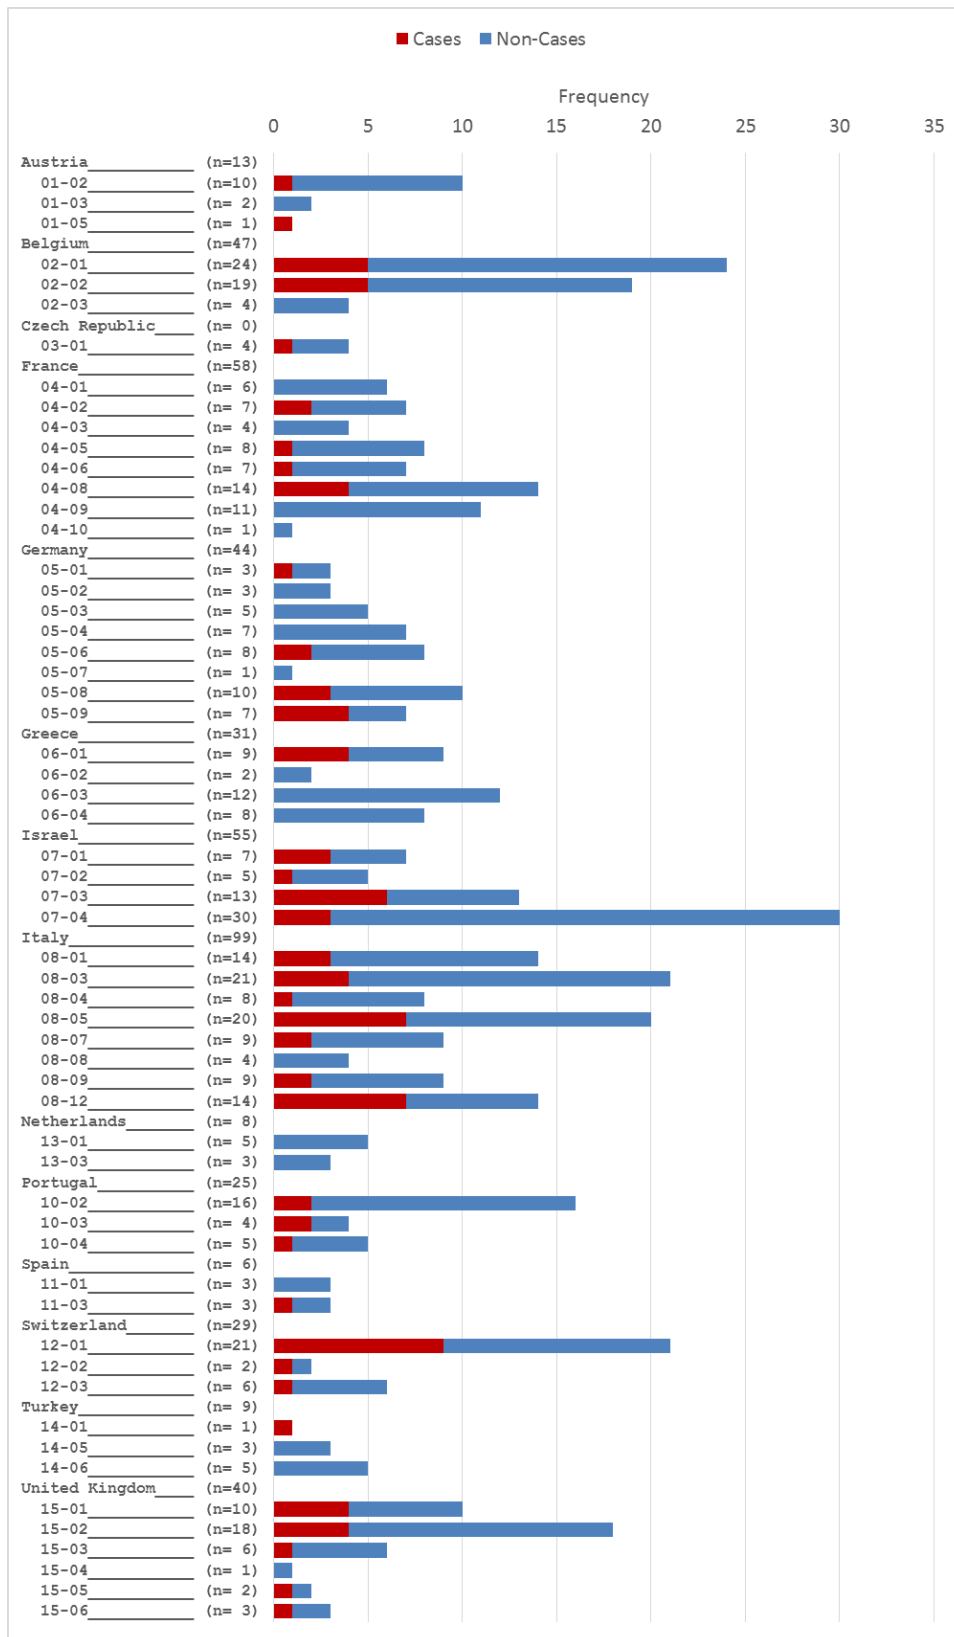

The median (minimum, maximum) number of patients/center was 1 (0, 31) and Cases/center was 1 (0,9).

## 10. Within-bundle MLR models

**Table S11. Bundle 1: Demographics within-bundle MLR model**

| Variable          | Category | Coefficient estimate | Standard error | MLR<br>(within-bundle) |                 |         |
|-------------------|----------|----------------------|----------------|------------------------|-----------------|---------|
|                   |          |                      |                | OR (95% CI)            | Wald Chi-square | P value |
| Intercept         |          | -0.3249              | 0.4515         | 0.723<br>(0.298–1.751) | 0.5178          | 0.4718  |
| Age at enrollment |          | -0.0177              | 0.0084         | 0.982<br>(0.966–0.999) | 4.4803          | 0.0343  |

ROC-AUC (95% CI): 0.574 (0.508–0.639)

### Multivariable logistic regression equation

Probability (new DU within 6 months) =  $\exp(\text{linear predictor}) / (1 + \exp(\text{linear predictor}))$ , where

$$\text{linear predictor} = -0.325$$

$$-0.018 * \text{age at enrollment}$$

---

Hosmer-Lemeshow goodness-of-fit test: Chi-Square = 4.3621, df = 8, p value = 0.823

Abbreviations: AUC, area under the curve; CI, confidence interval; DU, digital ulcer; MLR, multivariable logistic regression; OR, odds ratio; ROC, receiver operating characteristic

**Table S12.Bundle 2: Systemic sclerosis clinical characteristics within-bundle MLR model**

|                                                                          |          | MLR<br>(within-bundle) |                |                        |                 |         |
|--------------------------------------------------------------------------|----------|------------------------|----------------|------------------------|-----------------|---------|
| Variable                                                                 | Category | Coefficient estimate   | Standard error | OR (95% CI)            | Wald Chi-square | P value |
| Intercept                                                                |          | -0.5921                | 0.3824         | 0.553<br>(0.261–1.170) | 2.3975          | 0.1215  |
| Age at first physician-<br>documented<br>non-Raynaud<br>clinical feature |          | -0.0163                | 0.0084         | 0.984<br>(0.968–1.000) | 3.7777          | 0.0519  |
| Kidney involvement:<br>SSc renal crisis,<br>kidney failure               | Yes      | -1.3314                | 0.7540         | 0.264<br>(0.060–1.158) | 3.1180          | 0.0774  |
| Heart involvement                                                        | Yes      | 0.5874                 | 0.2904         | 1.799<br>(1.018–3.179) | 4.0908          | 0.0431  |

ROC-AUC (95% CI): 0.601 (0.537–0.664)

**Multivariable logistic regression equation**

Probability (new DU within 6 months) =  $\exp(\text{linear predictor}) / (1 + \exp(\text{linear predictor}))$ , where

$$\text{linear predictor} = -0.592$$

$$- 0.016 * \text{age at first physician-documented non-Raynaud}$$

$$\text{clinical feature}$$

$$+ (-1.331 \text{ if Kidney involvement} = \text{YES})$$

$$+ (0.587 \text{ if Heart involvement} = \text{YES})$$

Hosmer-Lemeshow goodness-of-fit test: Chi-Square = 20.0667, df = 8, p value = 0.010

Abbreviations: AUC, area under the curve; CI, confidence interval; df, degrees of freedom; DU, digital ulcer; MLR, multivariable logistic regression; OR, odds ratio; ROC, receiver operating characteristic; SSc, systemic sclerosis

**Table S13. Bundle 3: Digital ulcer characteristics within-bundle MLR model**

| Variable                                | Category | Coefficient estimate | Standard error | MLR (within-bundle)     |                 |         |
|-----------------------------------------|----------|----------------------|----------------|-------------------------|-----------------|---------|
|                                         |          |                      |                | OR (95% CI)             | Wald Chi-square | P value |
| Intercept                               |          | -1.8948              | 0.1705         | 0.150<br>(0.108–0.210)  | 123.5659        | <0.0001 |
| Number of DUs at enrollment categorized | 1        | 0.8362               | 0.3169         | 2.308<br>(1.240–4.295)  | 6.9624          | 0.0083  |
|                                         | 2        | 1.0603               | 0.3808         | 2.887<br>(1.369–6.090)  | 7.7538          | 0.0054  |
|                                         | ≥3       | 1.9168               | 0.3659         | 6.799<br>(3.319–13.930) | 27.4362         | <0.0001 |
| Previous complication: auto-amputation  | Yes      | 0.8375               | 0.4470         | 2.310<br>(0.962–5.549)  | 3.5095          | 0.0610  |
| Presence of CDI at enrollment           | Yes      | 0.8440               | 0.4510         | 2.326<br>(0.961–5.629)  | 3.5026          | 0.0613  |

ROC-AUC (95% CI): 0.694 (0.637, 0.751)

**Multivariable logistic regression equation**

Probability (new DU within 6 months) = exp (linear predictor)/(1 + exp (linear predictor)), where

$$\begin{aligned}
 \text{linear predictor} = & -1.895 \\
 & + (0.836 \text{ if } 1 \text{ DU or } 1.060 \text{ in } 2 \text{ DU or } 1.917 \text{ if } \geq 3 \text{ DU}) \\
 & + (0.838 \text{ if previous auto-amputation} = \text{YES}) \\
 & + (0.844 \text{ if CDI} = \text{YES})
 \end{aligned}$$

Hosmer-Lemeshow goodness-of-fit test: Chi-Square = 0.7316, df = 2, p value = 0.694

Abbreviations: AUC, area under the curve; CDI, critical digital ischemia; CI, confidence interval; df, degrees of freedom; DU, digital ulcer; MLR, multivariable logistic regression; OR, odds ratio; ROC, receiver operating characteristic; SSc, systemic sclerosis

**Table S14. Bundle 4: Other clinical characteristics within-bundle MLR model**

| Variable               | Category | MLR<br>(within-bundle) |                |                        |                 |         |
|------------------------|----------|------------------------|----------------|------------------------|-----------------|---------|
|                        |          | Coefficient estimate   | Standard error | OR (95% CI)            | Wald Chi-square | P value |
| Intercept              |          | -1.3730                | 0.1284         | 0.253<br>(0.197–0.326) | 114.3192        | <0.0001 |
| Presence of paronychia | Yes      | 0.7066                 | 0.3101         | 2.027<br>(1.104–3.722) | 5.1923          | 0.0227  |

ROC-AUC (95% CI): 0.545 (0.501, 0.589)

#### Multivariable logistic regression equation

Probability (new DU within 6 months) =  $\exp(\text{linear predictor}) / (1 + \exp(\text{linear predictor}))$ , where

$$\text{linear predictor} = -1.373$$

$$+ (0.707 \text{ if presence of paronychia} = \text{YES})$$

Hosmer-Lemeshow goodness-of-fit test: Chi-Square = 0.000, df = 0

Abbreviations: AUC, area under the curve; CI, confidence interval; df, degrees of freedom; DU, digital ulcer; MLR, multivariable logistic regression; OR, odds ratio; ROC, receiver operating characteristic

**Table S15. Bundle 5: Quantitative NVC characteristics\* within-bundle MLR model**

|                                                      |                                | MLR<br>(within-bundle) |                |                        |                 |         |
|------------------------------------------------------|--------------------------------|------------------------|----------------|------------------------|-----------------|---------|
| Variable                                             | Category                       | Coefficient estimate   | Standard error | OR (95% CI)            | Wald Chi-square | P value |
| Intercept                                            |                                | -0.3538                | 0.3108         | 0.702<br>(0.382–1.291) | 1.2961          | 0.2549  |
| Finger level:                                        | IF: Number of microhemorrhages | -1.0510                | 0.4956         | 0.350<br>(0.132–0.923) | 4.4974          | 0.0339  |
| dominant hand, 4 individual fingers (Sub-bundle 5.5) | MF: Number of capillaries      | -0.2384                | 0.0700         | 0.788<br>(0.687–0.904) | 11.5852         | 0.0007  |
|                                                      | MF: Number of neoangiogeneses  | 0.2993                 | 0.1441         | 1.349<br>(1.017–1.789) | 4.3126          | 0.0378  |

ROC-AUC (95% CI): 0.677 (0.614–0.740)

### Multivariable logistic regression equation

Probability (new DUs within 6 months) = exp (linear predictor)/(1 + exp (linear predictor)), where

$$\begin{aligned} \text{linear predictor} = & -0.354 \\ & -1.051 * \text{nb IF microhemorrhages} \\ & -0.238 * \text{nb MF capillaries} \\ & +0.299 * \text{nb MF neoangiogeneses} \end{aligned}$$

Hosmer-Lemeshow goodness-of-fit test: Chi-Square = 7.9131, df = 8, p value = 0.442

Abbreviations: AUC, area under the curve; CI, confidence interval; df, degrees of freedom; DU, digital ulcer; IF, index finger; MF, middle finger; MLR, multivariable logistic regression; NVC, nailfold videocapillaroscopy; OR, odds ratio; ROC, receiver operating characteristic

**Table S16. Comparison of the within-bundle MLR models of NVC sub-bundles**

| Sub-bundle                | 5.1         | 5.2           | 5.3               | 5.4          | 5.5                              | 5.6                                  |
|---------------------------|-------------|---------------|-------------------|--------------|----------------------------------|--------------------------------------|
|                           | Both hands  | Dominant hand | Non-dominant hand | Finger pairs | Individual fingers dominant hand | Individual fingers non-dominant hand |
| N* (of 468)               | 465         | 460           | 460               | 447          | 382                              | 399                                  |
| ROC-AUC                   | 0.617       | 0.606         | 0.613             | 0.655        | 0.677                            | 0.638                                |
| ROC-AUC 95% CI            | 0.555–0.678 | 0.547–0.665   | 0.551–0.676       | 0.593–0.716  | 0.614–0.740                      | 0.570–0.705                          |
| <b>Selected variables</b> |             |               |                   |              |                                  |                                      |
| # Capillaries             | X           | X             | X                 | X            | X                                | X                                    |
| # Neoangiogeneses         | X           |               | X                 | X            | X                                | X                                    |
| # Microhemorrhages        |             |               |                   | X            | X                                | X                                    |

\*Number of patients for whom data on all variables used in MLR are available

Abbreviations: AUC, area under the curve; CI, confidence interval; MLR, multivariable logistic regression; NVC, nailfold videocapillaroscopy; ROC, receiver operating characteristic



## 11. NVC characteristics carried forward during multivariable analyses

**Supplementary Table S17. Complete list of NVC variables carried forward from MLR within-bundle to MLR across-bundles analysis**

| NVC Sub-bundle                                                             | Variables retained to enter MLR across-bundles                                               | ROC-AUC (95% CI)    |
|----------------------------------------------------------------------------|----------------------------------------------------------------------------------------------|---------------------|
| <b>Qualitative NVC characteristics</b>                                     |                                                                                              |                     |
| NVC pattern                                                                | NVC pattern                                                                                  | 0.597 (0.548–0.647) |
| <b>Quantitative NVC characteristics</b>                                    |                                                                                              |                     |
| Patient level: both hands, 8 fingers<br>(=sub-bundle 5.1)                  | Number of capillaries<br>Number of neoangiogeneses                                           | 0.617 (0.555–0.678) |
| Hand level: dominant hand, 4 fingers<br>(=sub-bundle 5.2)                  | Number of capillaries                                                                        | 0.606 (0.547–0.665) |
| Hand level: non-dominant hand, 4 fingers<br>(=sub-bundle 5.3)              | Number of capillaries<br>Number of neoangiogeneses                                           | 0.613 (0.551–0.676) |
| Finger level: both hands, 4 pairs of fingers<br>(=sub-bundle 5.4)          | IF: Number of microhemorrhages<br>IF: Number of neoangiogeneses<br>MF: Number of capillaries | 0.655 (0.593–0.716) |
| Finger level: dominant hand, 4 individual fingers<br>(=sub-bundle 5.5)     | IF: Number of microhemorrhages<br>MF: Number of capillaries<br>MF: Number of neoangiogeneses | 0.677 (0.614–0.740) |
| Finger level: non-dominant hand, 4 individual fingers<br>(=sub-bundle 5.6) | IF: Number of microhemorrhages<br>IF: Number of neoangiogeneses<br>RF: Number of capillaries | 0.638 (0.570–0.705) |

Abbreviations: AUC, area under the curve; CI, confidence interval; IF, index finger; MF, middle finger; MLR, multivariable logistic regression; NVC, nailfold videocapillaroscopy; RF, ring finger; ROC, receiver operating characteristic

## 12. Operating characteristics of the final MLR model

Supplementary Figure S3. Receiver operating characteristic curve (A) and sensitivity/specificity\* curves (B) of the final MLR model

A

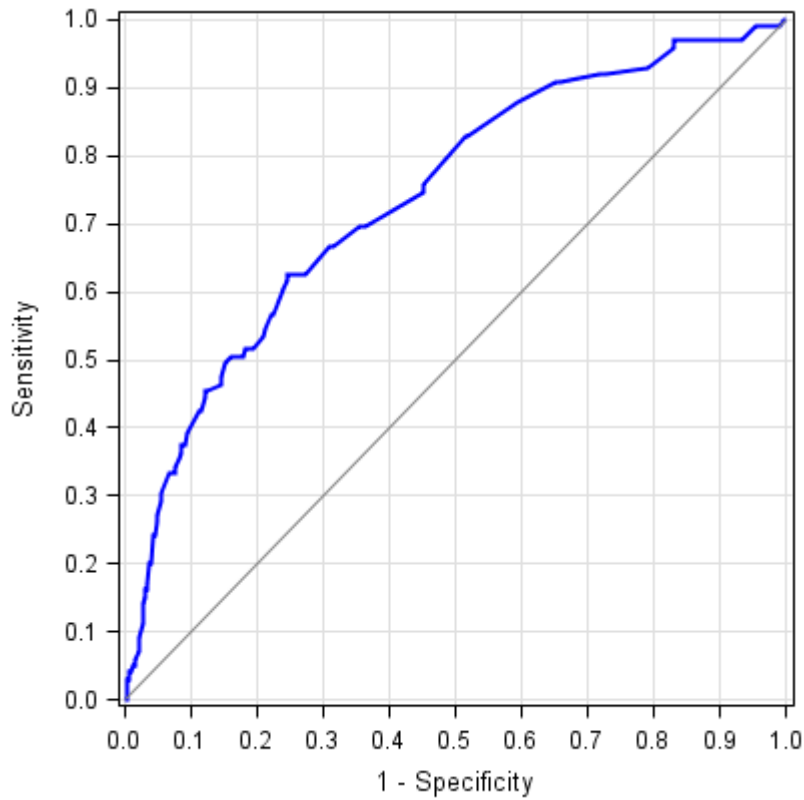

B

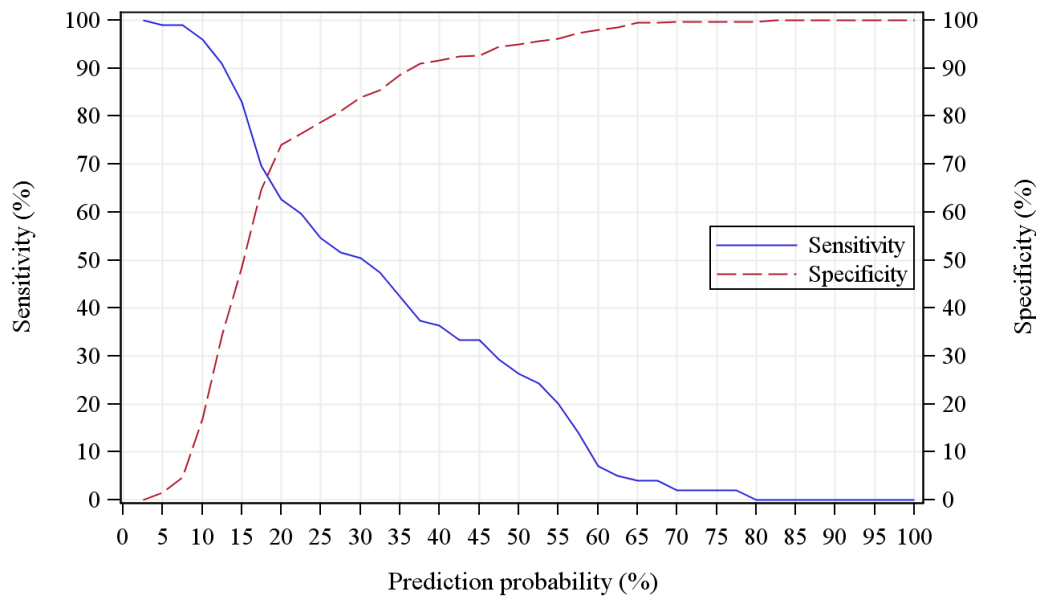

\*vs 2.5% cut-offs

### **13. CAP study Statisticians**

In addition to the acknowledged and author statisticians, the following statisticians were involved in the statistical analysis plan and/or performing analyses:

**Sophie Collingborn**, *PRA International GmbH, Mannheim, Germany*; **Hans-Peter Duerr & Martin Scott**, *Numerus Ltd, Tübingen, Germany*.
